# Supplementary material for: Prediction of Th1 and Cytotoxic T Lymphocyte Epitopes of Mycobacterium tuberculosis and Evaluation of Their Potential in the Diagnosis of Tuberculosis in a Mouse Model and in Humans
Source: PubMed Central journal article supplement (PMC9430503; doi:10.1128/spectrum.01438-22), 2022-08-08
Supplement: spectrum.01438-22-s0001.pdf [file spectrum.01438-22-s0001.pdf]

## Supplementary materials

Table S1 Twelve MHC I alleles and 25 MHC II alleles with high-frequency were identified in Chinese population

| <b>DRB1</b>    | <b>DQA1/DQB1</b>          | <b>DPA1/DPB1</b>          |
|----------------|---------------------------|---------------------------|
| HLA-DRB1*12:02 | HLA-DQA1*05:01/DQB1*02:01 | HLA-DPA1*01:03/DPB1*02:01 |
| HLA-DRB1*09:01 | HLA-DQA1*05:01/DQB1*03:01 | HLA-DPA1*01/DPB1*04:01    |
| HLA-DRB1*14:01 | HLA-DQA1*03:01/DQB1*03:02 | HLA-DPA1*03:01/DPB1*04:02 |
| HLA-DRB1*07:01 | HLA-DQA1*01:01/DQB1*05:01 | HLA-DPA1*02:01/DPB1*05:01 |
| HLA-DRB1*15:01 | HLA-DQA1*01:02/DQB1*06:02 |                           |
| HLA-DRB1*15:04 | HLA-DQA1*02:01/DQB1*05:02 |                           |
| HLA-DRB1*15:02 | HLA-DQA1*06:01/DQB1*03:03 |                           |
| HLA-DRB1*16:02 | HLA-DQA1*03:01/DQB1*06:01 |                           |
| HLA-DRB1*14:04 |                           |                           |
| HLA-DRB3*01:01 |                           |                           |
| HLA-DRB3*02:02 |                           |                           |
| HLA-DRB4*01:01 |                           |                           |
| HLA-DRB5*01:01 |                           |                           |
| <b>HLA-A</b>   | <b>HLA-B</b>              | <b>HLA-C</b>              |
| A*11:01        | B*15:01                   | C*01:02                   |
| A*02:01        | B*15:02                   | C*07:02                   |
| A*24:02        | B*15:11                   | C*03:04                   |
| A*33:03        |                           | C*06:02                   |
| A*30:01        |                           |                           |

**Table S2. The characteristics of Th1 dominant epitopes associated with LTBI-RD antigens**

| Antigen        | Allele <sup>1</sup>                                                  | Start | End | Epitopes        | Method <sup>2</sup>           | Percentile_rank <sup>3</sup> |
|----------------|----------------------------------------------------------------------|-------|-----|-----------------|-------------------------------|------------------------------|
| <b>Rv1737c</b> | HLA-DPA1*01:03/DPB1*02:01                                            | 292   | 306 | QPPPEVWSAATFITL | Consensus (comb.lib./simm/nn) | 0.01                         |
|                | HLA-DPA1*01/DPB1*04:01                                               | 95    | 109 | GSYALLVFFGLFLGV | Consensus (comb.lib./simm/nn) | 0.03                         |
|                | HLA-DQA1*06:01/DQB1*03:03<br>HLA-DQA1*03:01/DQB1*06:01               | 162   | 176 | TTHAIVAAALASTAV | NetMHCIIpan                   | 0.06                         |
|                | HLA-DRB1*15:02<br>HLA-DPA1*01/DPB1*04:01                             | 93    | 107 | TMGSYALLVFFGLFL | sturniolo                     | 0.07                         |
|                | HLA-DRB1*09:01                                                       | 193   | 207 | DPVLPRLKAAARLPV | Consensus (comb.lib./simm/nn) | 0.08                         |
|                | HLA-DQA1*05:01/DQB1*03:01                                            | 164   | 178 | HAIVAAALASTAVVA | Consensus (comb.lib./simm/nn) | 0.18                         |
|                | HLA-DQA1*01:02/DQB1*06:02                                            | 1     | 15  | MRGQAANLVLATWIS | Consensus (comb.lib./simm/nn) | 0.19                         |
|                | HLA-DRB1*15:01                                                       | 97    | 111 | YALLVFFGLFLGVAG | Consensus (simm/nn/sturniolo) | 0.23                         |
|                | HLA-DQA1*03:01/DQB1*03:02                                            | 277   | 291 | ASLAGTALLAFAAAL | Consensus (comb.lib./simm/nn) | 0.64                         |
|                | HLA-DRB5*01:01                                                       | 233   | 247 | ITTIYGFSTVDAGAR | Consensus (simm/nn/sturniolo) | 0.78                         |
|                | HLA-DRB3*01:01<br>HLA-DPA1*03:01/DPB1*04:02                          | 42    | 56  | EASLLVATPILVGAL | Consensus (comb.lib./simm/nn) | 0.81                         |
|                | HLA-DPA1*02:01/DPB1*05:01                                            | 91    | 105 | AATMGSYALLVFFGL | Consensus (comb.lib./simm/nn) | 0.85                         |
|                | HLA-DRB1*14:01<br>HLA-DRB1*14:04<br>HLA-DRB3*02:02<br>HLA-DRB1*12:02 | 195   | 209 | VLPRKAAARLPVTW  | NetMHCIIpan                   | 1.16                         |
|                | HLA-DQA1*01:01/DQB1*05:01                                            | 143   | 157 | GTALSAFFTPRFVRW | Consensus (comb.lib./simm/nn) | 1.34                         |
|                | HLA-DQA1*02:01/DQB1*05:02                                            | 14    | 28  | ISVVNFVAWNLIGPL | NetMHCIIpan                   | 1.35                         |
|                | HLA-DRB1*16:02                                                       | 153   | 167 | RFVRFGLFTTHAIV  | NetMHCIIpan                   | 1.46                         |

|                |                                                                                                                            |     |     |                  |                              |      |
|----------------|----------------------------------------------------------------------------------------------------------------------------|-----|-----|------------------|------------------------------|------|
|                | HLA-DRB1*07:01                                                                                                             | 222 | 236 | FVAFSNYLPTYITTI  | Consensus (comb.lib./smm/nn) | 1.93 |
|                | HLA-DQA1*05:01/DQB1*02:01                                                                                                  | 72  | 86  | AMLIAVTLASILPVL  | Consensus (comb.lib./smm/nn) | 2.07 |
|                | HLA-DRB1*15:04                                                                                                             | 314 | 328 | TGGVFAWVARRAPAA  | NetMHCIIpan                  | 2.39 |
|                | HLA-DRB4*01:01                                                                                                             | 173 | 187 | STAVVAMVVLRDAPY  | Consensus (comb.lib./smm/nn) | 3.34 |
| <b>Rv2031c</b> | HLA-DRB1*09:01                                                                                                             | 95  | 109 | YGSFVRTVSLPVGAD  | Consensus (comb.lib./smm/nn) | 0.02 |
|                | HLA-DRB1*07:01<br>HLA-DRB1*15:02<br>HLA-DRB5*01:01                                                                         | 92  | 106 | EFAYGSFVRTVSLPV  | Consensus (comb.lib./smm/nn) | 0.04 |
|                | HLA-DRB3*02:02<br>HLA-DRB1*14:01<br>HLA-DRB1*14:04<br>HLA-DRB1*15:04<br>HLA-DRB1*15:01<br>HLA-DRB1*16:02<br>HLA-DRB1*12:02 | 94  | 108 | AYGSFVRTVSLPVGA  | NetMHCIIpan                  | 0.08 |
|                | HLA-DPA1*01:03/DPB1*02:01<br>HLA-DQA1*05:01/DQB1*03:01                                                                     | 88  | 102 | DGRSEFAYGSFVRTV  | Consensus (comb.lib./smm/nn) | 0.12 |
|                | HLA-DPA1*01/DPB1*04:01                                                                                                     | 89  | 103 | GRSEFAYGSFVRTVS  | Consensus (comb.lib./smm/nn) | 0.37 |
|                | HLA-DQA1*03:01/DQB1*03:02                                                                                                  | 14  | 28  | LFPEFSELF AAFPSF | Consensus (comb.lib./smm/nn) | 2.12 |
|                | HLA-DPA1*03:01/DPB1*04:02<br>HLA-DPA1*02:01/DPB1*05:01                                                                     | 90  | 104 | RSEFAYGSFVRTVSL  | Consensus (comb.lib./smm/nn) | 2.42 |
|                | HLA-DQA1*05:01/DQB1*02:01                                                                                                  | 12  | 26  | RSLFPEFSELF AAFP | Consensus (comb.lib./smm/nn) | 2.56 |
|                | HLA-DQA1*02:01/DQB1*05:02                                                                                                  | 11  | 25  | PRSLFPEFSELF AAF | NetMHCIIpan                  | 2.73 |
|                | HLA-DQA1*06:01/DQB1*03:03<br>HLA-DQA1*03:01/DQB1*06:01                                                                     | 117 | 131 | YDKGILTVSVAVSEG  | NetMHCIIpan                  | 3.68 |
|                | HLA-DRB3*01:01                                                                                                             | 63  | 77  | DKDVDIMVRDGQLTI  | Consensus (comb.lib./smm/nn) | 4.37 |

|                |                                                                                        |     |     |                  |                              |      |
|----------------|----------------------------------------------------------------------------------------|-----|-----|------------------|------------------------------|------|
|                | HLA-DQA1*01:02/DQB1*06:02                                                              | 118 | 132 | DKGILTVSVAVSEGK  | Consensus (comb.lib./smm/nn) | 4.76 |
|                | HLA-DRB4*01:01                                                                         | 96  | 110 | GSFVRTVSLPVGAD E | Consensus (comb.lib./smm/nn) | 6.26 |
| <b>Rv2626c</b> | HLA-DRB3*01:01                                                                         | 42  | 56  | DDRLHGMLTDRDIVI  | Consensus (comb.lib./smm/nn) | 0.01 |
|                | HLA-DRB1*09:01<br>HLA-DRB3*02:02<br>HLA-DRB1*15:04<br>HLA-DRB1*14:04<br>HLA-DRB1*14:01 | 128 | 142 | IVQFVKAICSPMALA  | Consensus (comb.lib./smm/nn) | 0.04 |
|                | HLA-DQA1*03:01/DQB1*03:02                                                              | 76  | 90  | DSIYYVDANASIQEM  | Consensus (comb.lib./smm/nn) | 0.57 |
|                | HLA-DRB1*15:01                                                                         | 126 | 140 | HAIVQFVKAICSPMA  | Consensus (smm/nn/sturniolo) | 1.11 |
|                | HLA-DQA1*06:01/DQB1*03:03<br>HLA-DQA1*03:01/DQB1*06:01<br>HLA-DQA1*02:01/DQB1*05:02    | 77  | 91  | SIYYVDANASIQEML  | NetMHCIIpan                  | 1.47 |
|                | HLA-DRB5*01:01<br>HLA-DRB1*12:02<br>HLA-DRB1*16:02<br>HLA-DRB4*01:01                   | 127 | 141 | AIVQFVKAICSPMAL  | Consensus (smm/nn/sturniolo) | 1.49 |
|                | HLA-DRB1*15:02                                                                         | 122 | 136 | HLPEHAIVQFVKAIC  | sturniolo                    | 2.03 |
|                | HLA-DQA1*01:01/DQB1*05:01                                                              | 73  | 87  | LARDSIYYVDANASI  | Consensus (comb.lib./smm/nn) | 2.98 |
|                | HLA-DQA1*01:02/DQB1*06:02                                                              | 15  | 29  | VGEHETLTAAQYMR   | Consensus (comb.lib./smm/nn) | 4.69 |
|                | HLA-DPA1*01:03/DPB1*02:01                                                              | 120 | 134 | ARHLPEHAIVQFVKA  | Consensus (comb.lib./smm/nn) | 5.03 |
|                | HLA-DQA1*05:01/DQB1*03:01                                                              | 3   | 17  | TARDIMNAGVTCVGE  | Consensus (comb.lib./smm/nn) | 5.04 |
|                | HLA-DRB1*07:01                                                                         | 125 | 139 | EHAIVQFVKAICSPM  | Consensus (comb.lib./smm/nn) | 5.28 |
|                | HLA-DQA1*05:01/DQB1*02:01                                                              | 79  | 93  | YYVDANASIQEMLNV  | Consensus (comb.lib./smm/nn) | 5.52 |
|                | HLA-DPA1*03:01/DPB1*04:02<br>HLA-DPA1*02:01/DPB1*05:01                                 | 123 | 137 | LPEHAIVQFVKAICS  | Consensus (comb.lib./smm/nn) | 7.83 |

|                |                                                                                        |     |     |                  |                              |      |
|----------------|----------------------------------------------------------------------------------------|-----|-----|------------------|------------------------------|------|
| <b>Rv2659c</b> | HLA-DRB1*16:02<br>HLA-DRB1*15:04                                                       | 294 | 308 | PSALYRMFYKARKAA  | NetMHCIIpan                  | 0.01 |
|                | HLA-DRB5*01:01<br>HLA-DRB1*14:04<br>HLA-DRB1*14:01<br>HLA-DRB1*12:02<br>HLA-DRB3*02:02 | 296 | 310 | ALYRMFYKARKAAGR  | Consensus (smm/nn/sturniolo) | 0.02 |
|                | HLA-DRB1*15:02                                                                         | 190 | 204 | KAMPDPYQAFVLMMAA | sturniolo                    | 0.12 |
|                | HLA-DRB1*09:01                                                                         | 194 | 208 | DPYQAFVLMMAAWLAM | Consensus (comb.lib./smm/nn) | 0.18 |
|                | HLA-DQA1*01:02/DQB1*06:02                                                              | 317 | 331 | DLRHSGAVLAASTGA  | Consensus (comb.lib./smm/nn) | 0.18 |
|                | HLA-DPA1*01:03/DPB1*02:01<br>HLA-DQA1*01:01/DQB1*05:01                                 | 199 | 213 | FVLMMAAWLAMRYGEL | Consensus (comb.lib./smm/nn) | 0.19 |
|                | HLA-DQA1*05:01/DQB1*03:01                                                              | 318 | 332 | LRHSGAVLAASTGAT  | Consensus (comb.lib./smm/nn) | 0.19 |
|                | HLA-DRB4*01:01                                                                         | 140 | 154 | HSYLLRAIMQTALA   | Consensus (comb.lib./smm/nn) | 0.39 |
|                | HLA-DRB3*01:01<br>HLA-DQA1*02:01/DQB1*05:02<br>HLA-DPA1*01/DPB1*04:01                  | 196 | 210 | YQAFVLMMAAWLAMRY | Consensus (comb.lib./smm/nn) | 0.4  |
|                | HLA-DQA1*06:01/DQB1*03:03                                                              | 323 | 337 | AVLAASTGATLAELM  | NetMHCIIpan                  | 0.53 |
|                | HLA-DQA1*03:01/DQB1*06:01                                                              | 315 | 329 | VHDLRHSGAVLAAST  | NetMHCIIpan                  | 0.61 |
|                | HLA-DRB1*15:01                                                                         | 193 | 207 | PDPYQAFVLMMAAWLA | Consensus (smm/nn/sturniolo) | 0.79 |
|                | HLA-DQA1*05:01/DQB1*02:01                                                              | 172 | 186 | RRVHKIRPATLDELE  | Consensus (comb.lib./smm/nn) | 1.48 |
|                | HLA-DRB1*07:01                                                                         | 130 | 144 | TAVGTPTMRAHSYSL  | Consensus (comb.lib./smm/nn) | 1.95 |
|                | HLA-DQA1*03:01/DQB1*03:02                                                              | 39  | 53  | KTFNAKIDAEAWLTD  | Consensus (comb.lib./smm/nn) | 2.41 |
|                | HLA-DPA1*03:01/DPB1*04:02                                                              | 97  | 111 | HYRKLLDNHILATFA  | Consensus (comb.lib./smm/nn) | 2.93 |
|                | HLA-DPA1*02:01/DPB1*05:01                                                              | 292 | 306 | LAPSALYRMFYKARK  | Consensus (comb.lib./smm/nn) | 5.38 |

|                |                                                        |    |    |                  |                              |      |
|----------------|--------------------------------------------------------|----|----|------------------|------------------------------|------|
| <b>Rv2660c</b> | HLA-DQA1*03:01/DQB1*06:01<br>HLA-DQA1*06:01/DQB1*03:03 | 2  | 16 | IAGVDQALAAATGQAS | NetMHCIIpan                  | 1.79 |
|                | HLA-DQA1*05:01/DQB1*03:01                              | 16 | 30 | SQRAAGASGGVTVGTV | Consensus (comb.lib./smm/nn) | 1.86 |
|                | HLA-DQA1*01:02/DQB1*06:02                              | 33 | 47 | GTEQRNLSVVAPSQF  | Consensus (comb.lib./smm/nn) | 4.02 |
|                | HLA-DRB1*09:01<br>HLA-DRB5*01:01                       | 36 | 50 | QRNLSVVAPSQFTFS  | Consensus (comb.lib./smm/nn) | 4.13 |
|                | HLA-DRB1*07:01                                         | 35 | 49 | EQRNLSVVAPSQFTF  | Consensus (comb.lib./smm/nn) | 4.89 |
|                | HLA-DRB1*15:02                                         | 59 | 73 | ETAGQSWCAILGLNQ  | sturniolo                    | 8.75 |

1. The HLA allele frequencies of Chinese population specific alleles were obtained from Allele Frequency Net Database (AFND, <http://www.allelefrequencies.net/default.asp>).

The preferences of DRB1, DPA1, DPB1, DQA1, and DQB1 were set as following: Country = China, Sample Size  $\geq 100$ , Allele Frequency  $\geq 0.10$  will be considered.

Finally, the following HLA alleles were chosen in this study: HLA-DRB1\*12:02, HLA-DRB1\*09:01, HLA-DRB1\*14:01, HLA-DRB1\*07:01, HLA-DRB1\*15:01, HLA-DRB1\*15:04, HLA-DRB1\*15:02, HLA-DRB1\*16:02, HLA-DRB1\*14:04, HLA-DRB3\*01:01, HLA-DRB3\*02:02, HLA-DRB4\*01:01, HLA-DRB5\*01:01, HLA-DQA1\*05:01/DQB1\*02:01, HLA-DQA1\*05:01/DQB1\*03:01, HLA-DQA1\*03:01/DQB1\*03:02, HLA-DQA1\*01:01/DQB1\*05:01, HLA-DQA1\*01:02/DQB1\*06:02, HLA-DQA1\*02:01/DQB1\*05:02, HLA-DQA1\*06:01/DQB1\*03:03, HLA-DQA1\*03:01/DQB1\*06:01, HLA-DPA1\*01:03/DPB1\*02:01, HLA-DPA1\*01/DPB1\*04:01, HLA-DPA1\*03:01/DPB1\*04:02, and HLA-DPA1\*02:01/DPB1\*05:01. These data were accessed on September 18, 2018.

2. The prediction method list box allows choosing between seven currently implemented MHC class II binding prediction methods: IEDB recommended, Consensus method, Combinatorial library, NN-align (netMHCII-2.2), SMM-align (netMHCII-1.1), Sturniolo, and NetMHCIIpan. The default selection IEDB Recommended is provided. Based

on availability of predictors and previously observed predictive performance, this selection tries to use the best possible method for a given MHC molecule. The selection IEDB Recommended uses the Consensus approach, combining NN-align, SMM-align, CombLib and Sturniolo if any corresponding predictor is available for the molecule, otherwise NetMHCIIpan is used.

3. For each peptide, a percentile rank for each of the three methods (combinatorial library, SMM\_align and Sturniolo) is generated by comparing the peptide's score against the scores of five million random 15 mers selected from SWISSPROT database. A small numbered percentile rank indicates high affinity. The median percentile rank of the three methods were then used to generate the rank for consensus method.

**Table S3. The characteristics of CTL dominant epitopes associated with LTBI-RD antigens**

| Antigen        | Allele <sup>1</sup> | Start | End | length | Peptide    | Method <sup>2</sup>                       | Percentile_rank <sup>3</sup> |
|----------------|---------------------|-------|-----|--------|------------|-------------------------------------------|------------------------------|
| <b>Rv1737c</b> | HLA-C*01:02         | 268   | 276 | 9      | RIAPRHVVL  | netmhcpan                                 | 0.01                         |
|                | HLA-A*33:03         | 378   | 386 | 9      | CTYTALHAR  | netmhcpan                                 | 0.02                         |
|                | HLA-B*15:11         | 179   | 187 | 9      | MVVLRDAPY  | netmhcpan                                 | 0.02                         |
|                | HLA-C*03:04         | 86    | 94  | 9      | LAVGVAATM  | netmhcpan                                 | 0.03                         |
|                | HLA-C*07:02         | 124   | 132 | 9      | WYQPARRGF  | Consensus (ann/smm)                       | 0.07                         |
|                | HLA-C*06:02         | 1     | 9   | 9      | MRGQAANLV  | Consensus (ann/smm)                       | 0.11                         |
|                | HLA-A*24:02         | 231   | 239 | 9      | TYITTIYGF  | Consensus (ann/smm)                       | 0.11                         |
|                | HLA-B*15:01         | 178   | 187 | 10     | AMVVLRDAPY | Consensus (ann/smm)                       | 0.18                         |
|                | HLA-A*02:01         | 44    | 53  | 10     | SLLVATPILV | Consensus (ann/smm)                       | 0.29                         |
|                | HLA-B*15:02         | 213   | 222 | 10     | FLYAIVFGGF | ann                                       | 0.34                         |
|                | HLA-A*11:01         | 145   | 153 | 9      | ALSAFFTPR  | Consensus (ann/smm)                       | 0.55                         |
|                | HLA-A*30:01         | 198   | 207 | 10     | RLKAAARLPV | Consensus (ann/smm)                       | 0.83                         |
| <b>Rv2031c</b> | HLA-C*03:04         | 23    | 31  | 9      | AAFPSFAGL  | netmhcpan                                 | 0.04                         |
|                | HLA-A*33:03         | 92    | 100 | 9      | EFAYGSFVR  | netmhcpan                                 | 0.05                         |
|                | HLA-C*01:02         | 13    | 21  | 9      | SLFPEFSEL  | netmhcpan                                 | 0.06                         |
|                | HLA-A*02:01         |       |     |        |            |                                           |                              |
|                | HLA-B*15:11         | 10    | 18  | 9      | HPRSLFPEF  | netmhcpan                                 | 0.15                         |
|                | HLA-A*24:02         | 14    | 22  | 9      | LFPEFSELF  | Consensus (ann/smm)                       | 0.17                         |
|                | HLA-B*15:01         | 20    | 28  | 9      | ELFAAFPSF  | Consensus<br>(ann/comblib_sidney2008/smm) | 0.3                          |



|                |                            |     |     |    |            |                                           |      |
|----------------|----------------------------|-----|-----|----|------------|-------------------------------------------|------|
|                | HLA-C*06:02<br>HLA-C*07:02 | 49  | 57  | 9  | GRYEVRAEL  | Consensus (ann/smm)                       | 0.39 |
|                | HLA-A*11:01                | 123 | 132 | 10 | TVSVAVSEGK | Consensus (ann/smm)                       | 0.52 |
|                | HLA-A*30:01                | 98  | 106 | 9  | FVRTVSLPV  | Consensus<br>(ann/comblib_sidney2008/smm) | 0.9  |
|                | HLA-B*15:02                | 87  | 95  | 9  | FDGRSEFAY  | Consensus (ann/smm)                       | 1.49 |
| <b>Rv2626c</b> | HLA-C*03:04<br>HLA-C*01:02 | 133 | 141 | 9  | KAICSPMAL  | netmhcpa                                  | 0.02 |
|                | HLA-B*15:11                | 131 | 139 | 9  | FVKAICSPM  | netmhcpa                                  | 0.03 |
|                | HLA-A*33:03<br>HLA-A*11:01 | 21  | 29  | 9  | LTAAAQYMR  | netmhcpa                                  | 0.09 |
|                | HLA-A*24:02                | 79  | 87  | 9  | YYVDANASI  | Consensus (ann/smm)                       | 0.22 |
|                | HLA-A*30:01                | 73  | 81  | 9  | LARDSIYYV  | Consensus<br>(ann/comblib_sidney2008/smm) | 0.4  |
|                | HLA-C*07:02                | 100 | 108 | 9  | RRVPVISEH  | Consensus (ann/smm)                       | 0.46 |
|                | HLA-A*02:01                | 72  | 81  | 10 | ELARDSIYYV | Consensus (ann/smm)                       | 0.48 |
|                | HLA-B*15:02                | 27  | 36  | 10 | YMREHDIGAL | ann                                       | 0.91 |
|                | HLA-B*15:01                | 71  | 80  | 10 | GELARDSIYY | Consensus (ann/smm)                       | 1.25 |
|                | HLA-C*06:02                | 120 | 128 | 9  | ARHLPEHAI  | Consensus (ann/smm)                       | 1.65 |
| <b>Rv2659c</b> | HLA-B*15:11                | 202 | 210 | 9  | MAAWLAMRY  | netmhcpa                                  | 0.02 |
|                | HLA-C*03:04<br>HLA-C*01:02 | 325 | 333 | 9  | LAASTGATL  | netmhcpa                                  | 0.02 |
|                | HLA-A*33:03                | 201 | 209 | 9  | LMAAWLAMR  | netmhcpa                                  | 0.05 |
|                | HLA-A*11:01                | 295 | 303 | 9  | SALYRMFYK  | Consensus (ann/smm)                       | 0.11 |

|                |                                                          |     |     |    |            |                                           |      |
|----------------|----------------------------------------------------------|-----|-----|----|------------|-------------------------------------------|------|
|                | HLA-C*06:02                                              | 208 | 216 | 9  | MRYGELTEL  | Consensus (ann/smm)                       | 0.12 |
|                | HLA-C*07:02                                              | 54  | 62  | 9  | RRREIDRQL  | Consensus (ann/smm)                       | 0.13 |
|                | HLA-A*30:01                                              | 93  | 101 | 9  | RTRAHYRKL  | Consensus(ann/comblib_siney2008/smm)      | 0.2  |
|                | HLA-B*15:02<br>HLA-B*15:01                               | 199 | 208 | 10 | FVLMAAWLAM | ann                                       | 0.29 |
|                | HLA-A*02:01                                              | 100 | 108 | 9  | KLLDNHILA  | Consensus(ann/comblib_siney2008/smm)      | 0.8  |
|                | HLA-A*24:02                                              | 191 | 199 | 9  | AMPDPYQAF  | Consensus (ann/smm)                       | 1.1  |
| <b>Rv2660c</b> | HLA-B*15:11<br>HLA-B*15:02                               | 47  | 56  | 10 | FTFSSRSPDF | netmhcpn                                  | 0.07 |
|                | HLA-C*01:02<br>HLA-C*03:04<br>HLA-C*07:02<br>HLA-A*24:02 | 41  | 49  | 9  | VVAPSQTF   | netmhcpn                                  | 0.17 |
|                | HLA-B*15:01                                              | 16  | 24  | 9  | SQRAAGASG  | Consensus<br>(ann/comblib_sidney2008/smm) | 0.7  |
|                | HLA-A*33:03<br>HLA-A*11:01                               | 43  | 52  | 10 | APSQTFSSR  | netmhcpn                                  | 0.86 |
|                | HLA-A*30:01                                              | 15  | 24  | 10 | ASQRAAGASG | Consensus (ann/smm)                       | 1.3  |
|                | HLA-C*06:02                                              | 51  | 59  | 9  | SRSPDFVDE  | Consensus (ann/smm)                       | 3.45 |
|                | HLA-A*02:01                                              | 62  | 71  | 10 | GQSWCAILGL | Consensus (ann/smm)                       | 4.1  |

1. The HLA allele frequencies of Chinese population specific alleles were obtained from Allele Frequency Net Database (AFND, <http://www.allelefrequencies.net/default.asp>).

The preferences of HLA-A, HLA-B, and HAL-C were set as following: Country = China, Sample Size  $\geq$  500, Allele Frequency  $\geq$  0.10 will be considered. Finally, the

following HLA alleles were chosen in this study: HLA-A\*11:01, HLA-A\*02:01, HLA-A\*24:02, HLA-A\*33:03, HLA-A\*30:01, HLA-B\*15:01, HLA-B\*15:02, HLA-B\*15:11, HLA-C\*01:02, HLA-C\*07:02, HLA-C\*03:04, and HLA-C\*06:02. These data were accessed on September 30, 2018.

2. The prediction method list box allows choosing from a number of MHC class I binding prediction methods: Artificial neural network (ANN), Stabilized matrix method (SMM), SMM with a Peptide: MHC Binding Energy Covariance matrix (SMMPMBEC), Scoring Matrices derived from Combinatorial Peptide Libraries (Comblib\_Sidney2008), Consensus, NetMHCpan, NetMHCcons, PickPocket and NetMHCstabpan. IEDB recommended is the default prediction method selection. Based on availability of predictors and previously observed predictive performance, this selection tries to use the best possible method for a given MHC molecule. Currently for peptide: MHC-I binding prediction, for a given MHC molecule, IEDB Recommended uses the Consensus method consisting of ANN, SMM, and CombLib if any corresponding predictor is available for the molecule. Otherwise, NetMHCpan is used. This choice was motivated by the expected predictive performance of the methods in decreasing order: Consensus > ANN > SMM > NetMHCpan > CombLib.

3. In addition to the IC<sub>50</sub> values for each peptide, a percentile rank is generated by comparing the peptide's IC<sub>50</sub> against those of a set of random peptides from SWISSPROT database. A small numbered percentile rank indicates high affinity. For the 'consensus' and 'IEDB recommended' methods, the median percentile rank of the methods used is reported as the representative percentile rank.

Th1-Rv1737c-P3

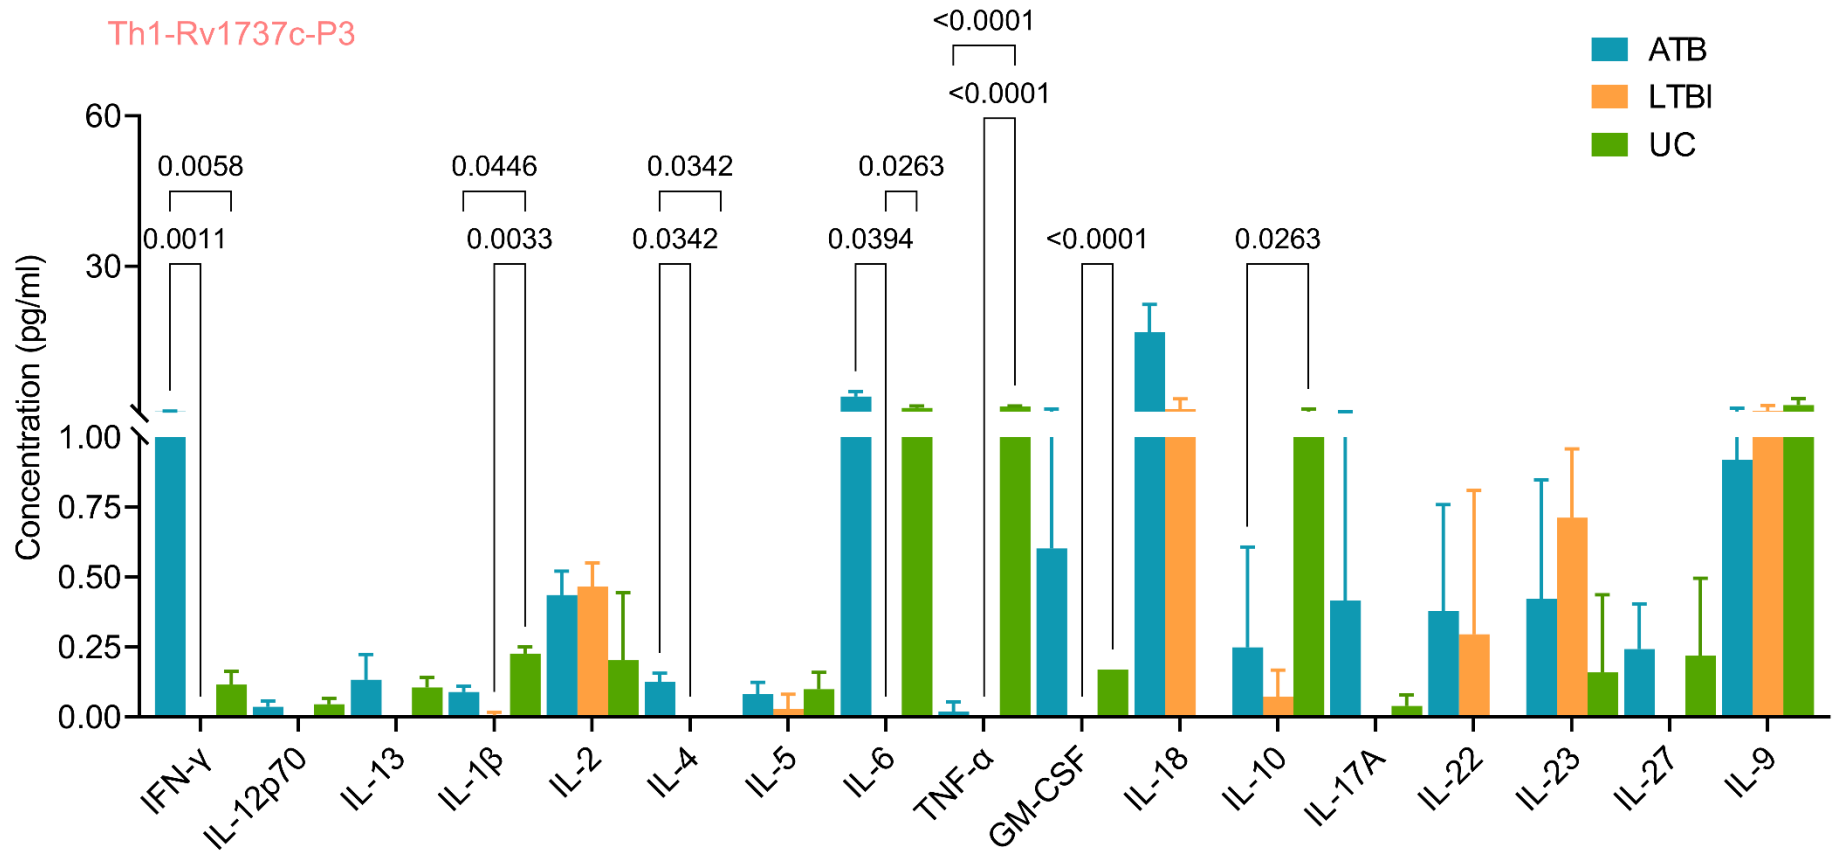

Th1-Rv1737c-P5

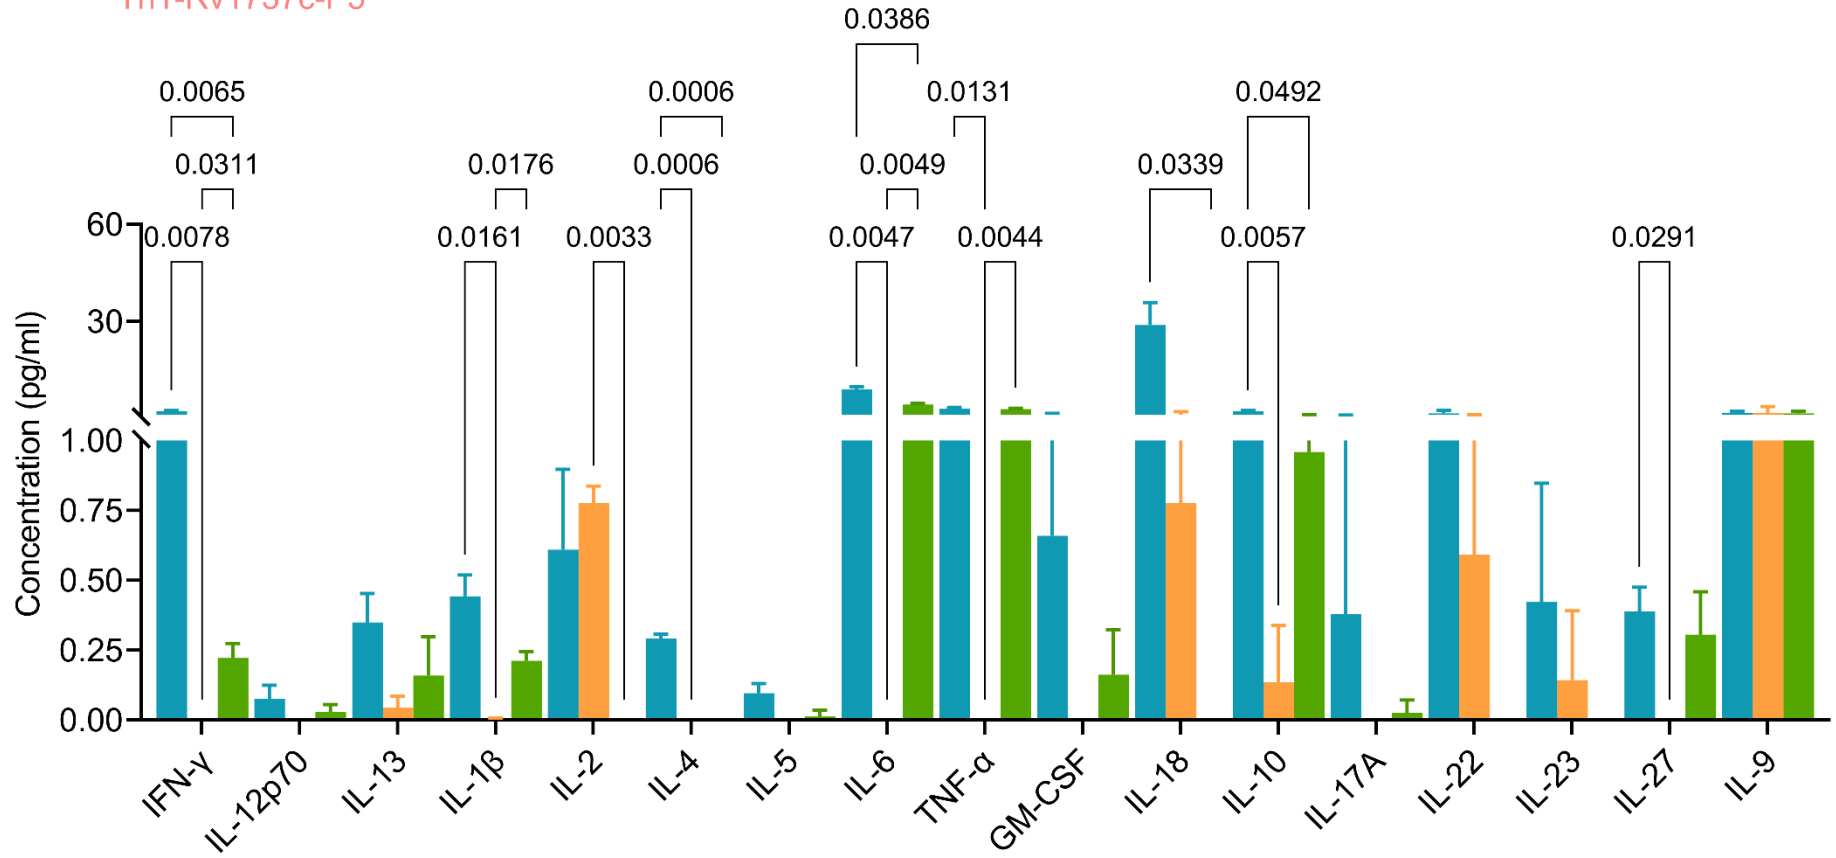

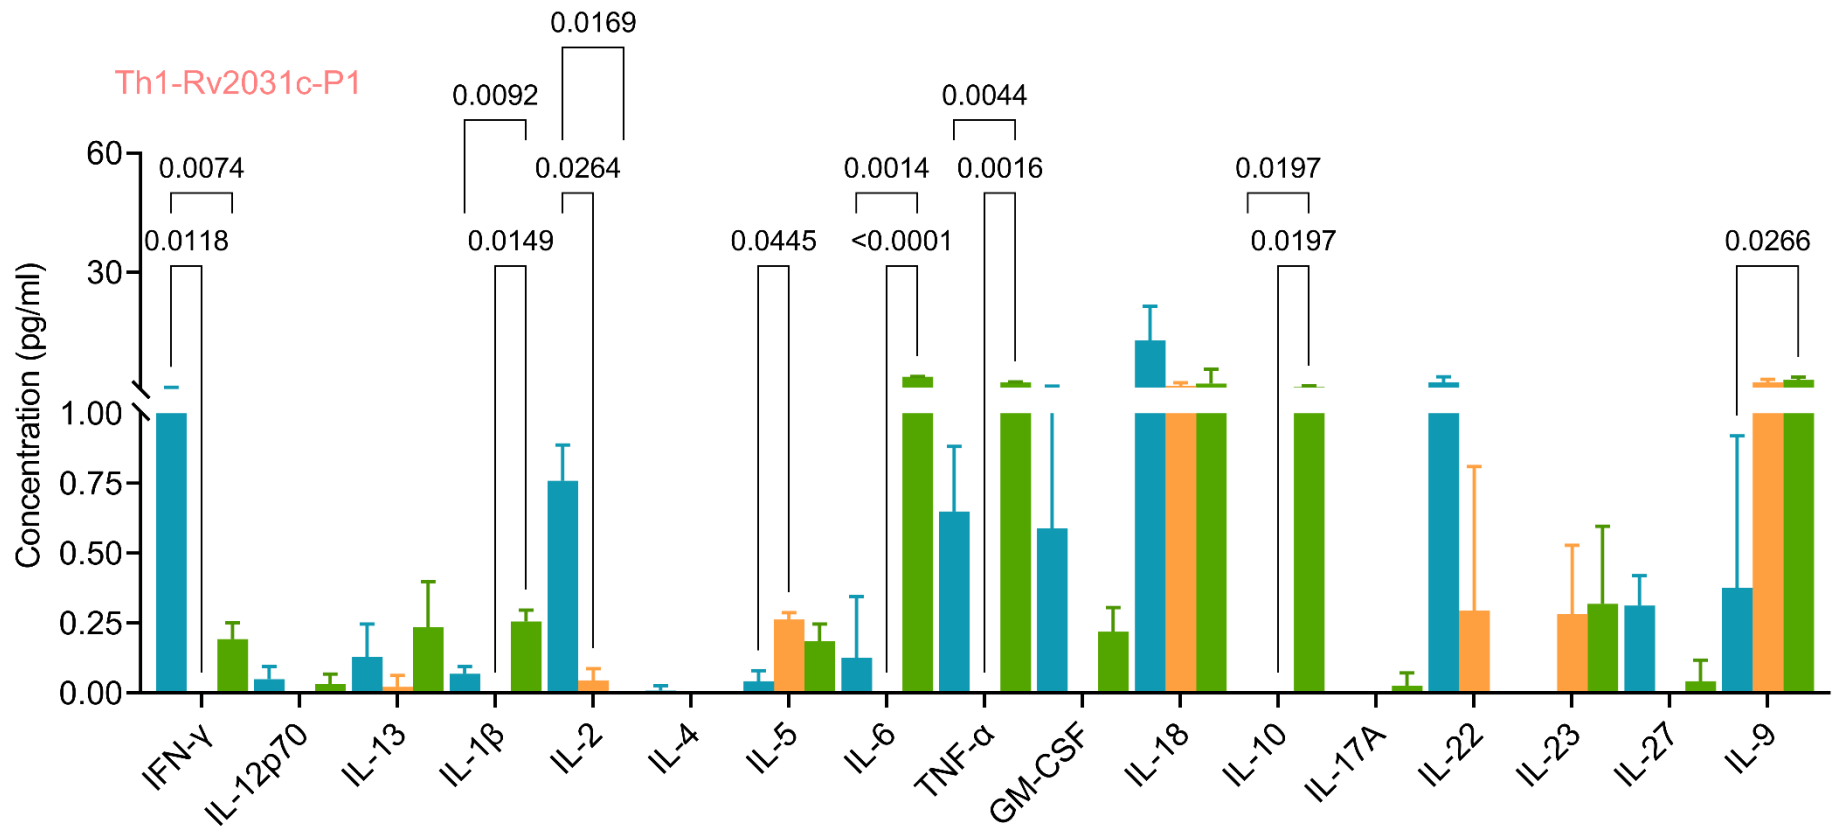

Th1-Rv2031c-P2

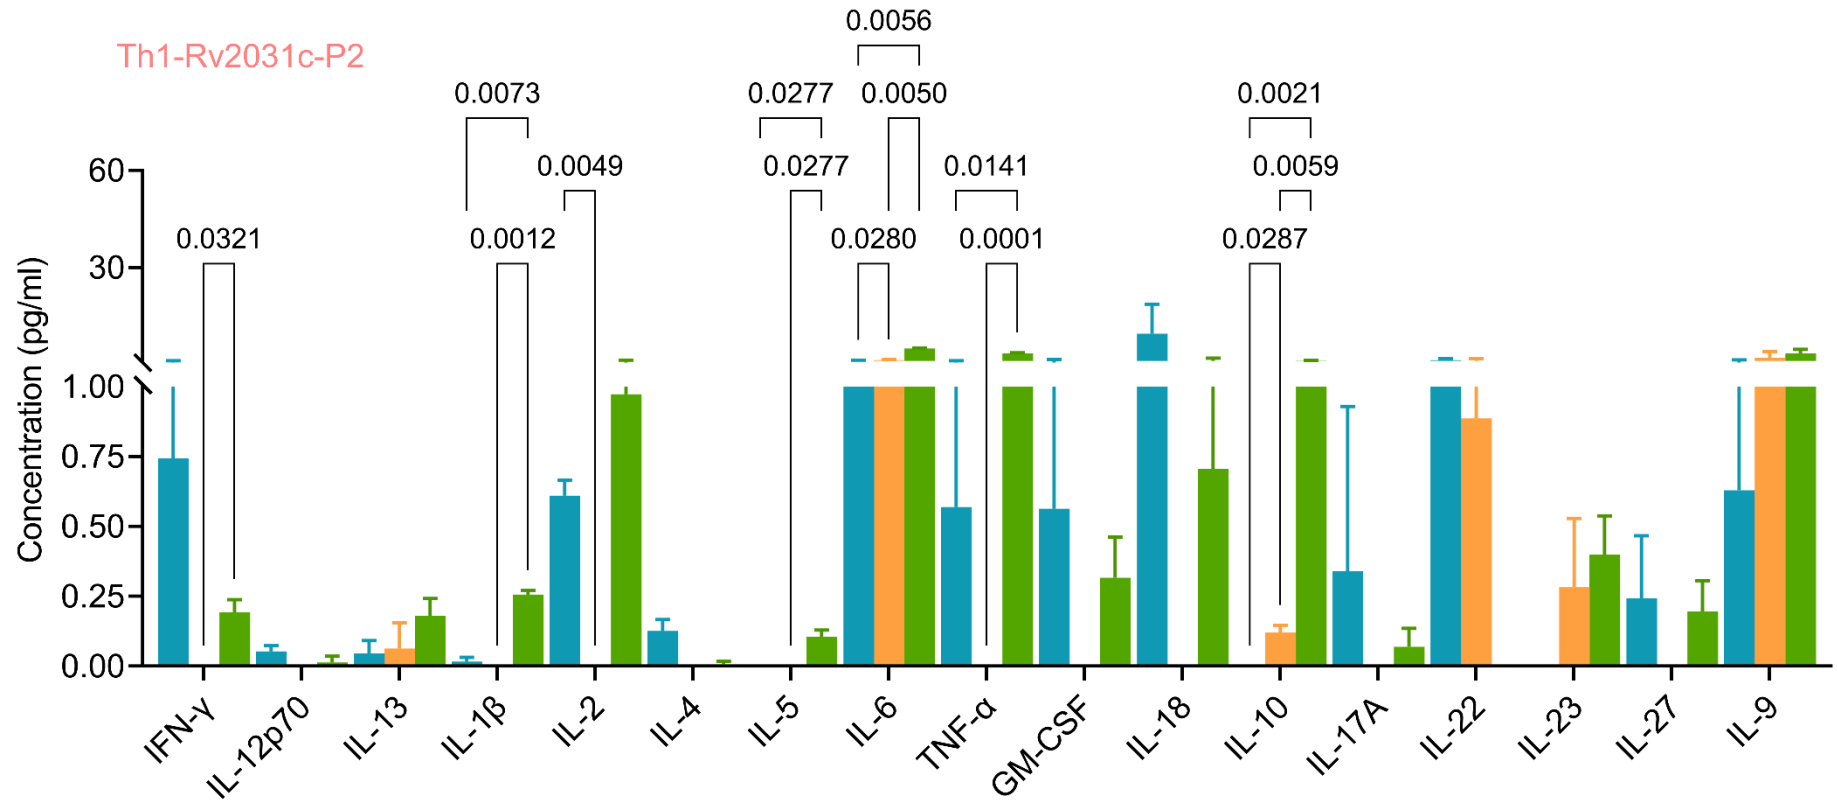

Th1-Rv2626c-P1

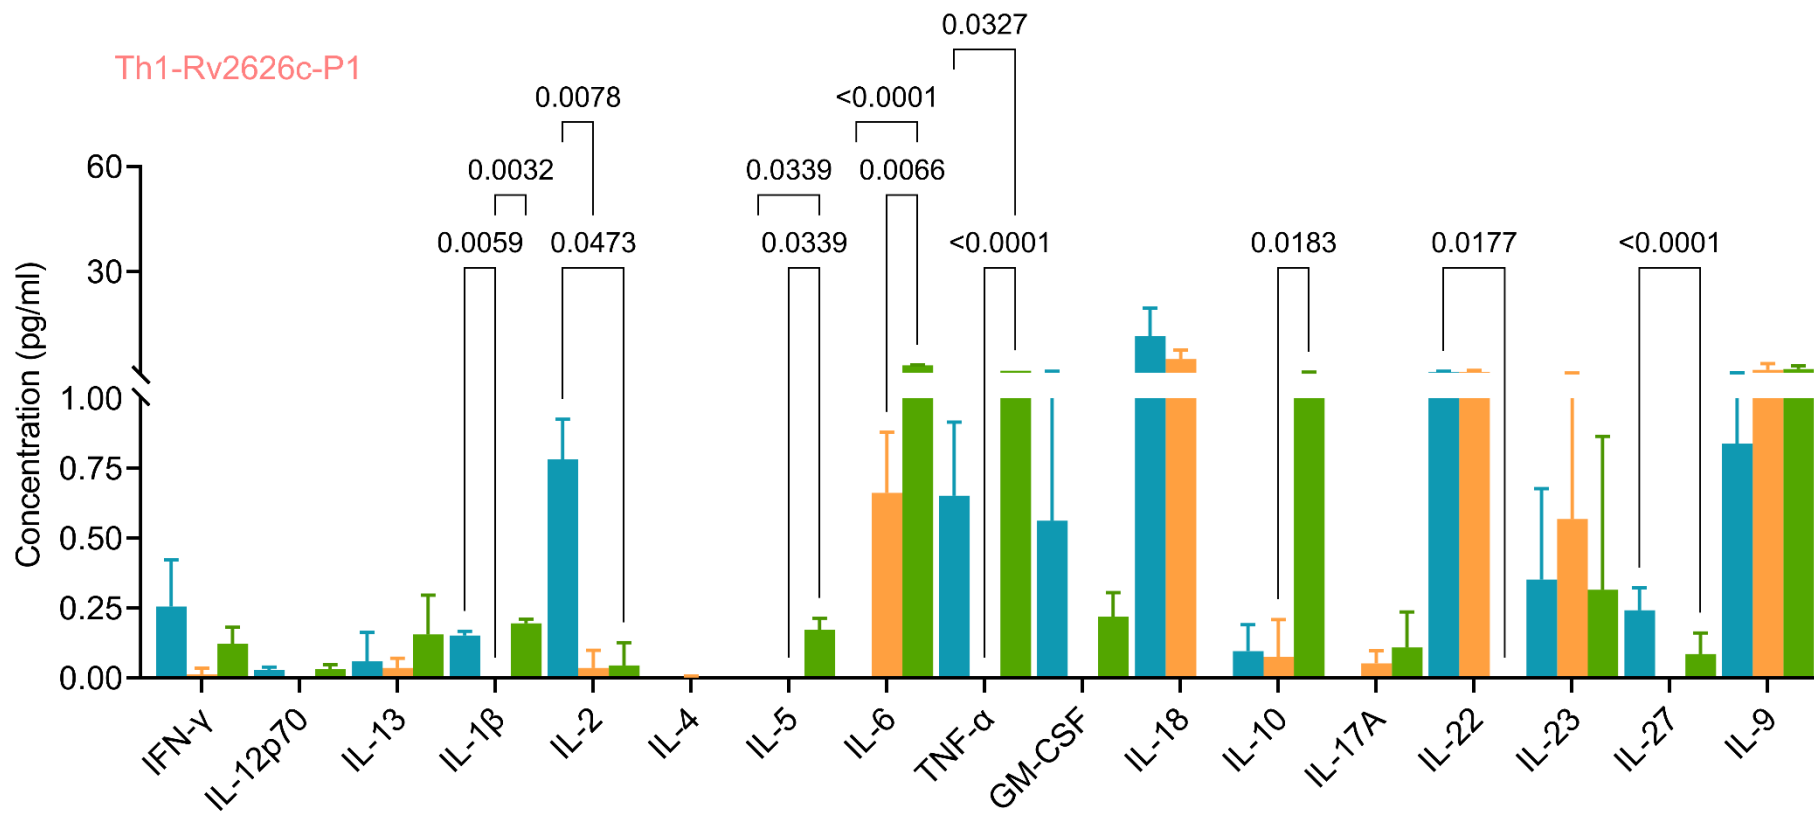



Th1-Rv2626c-P1

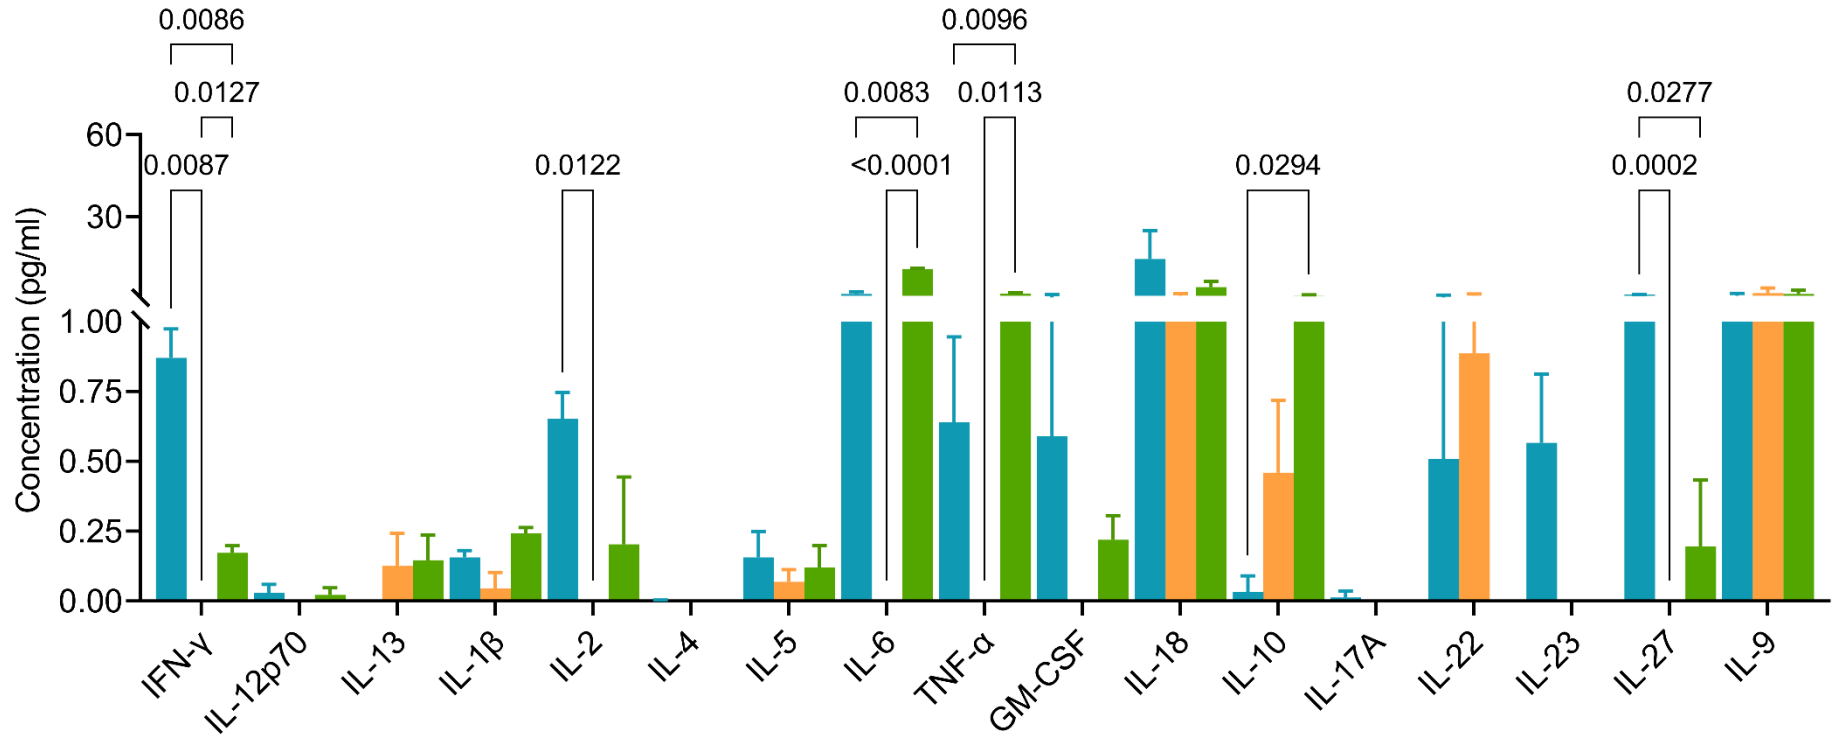

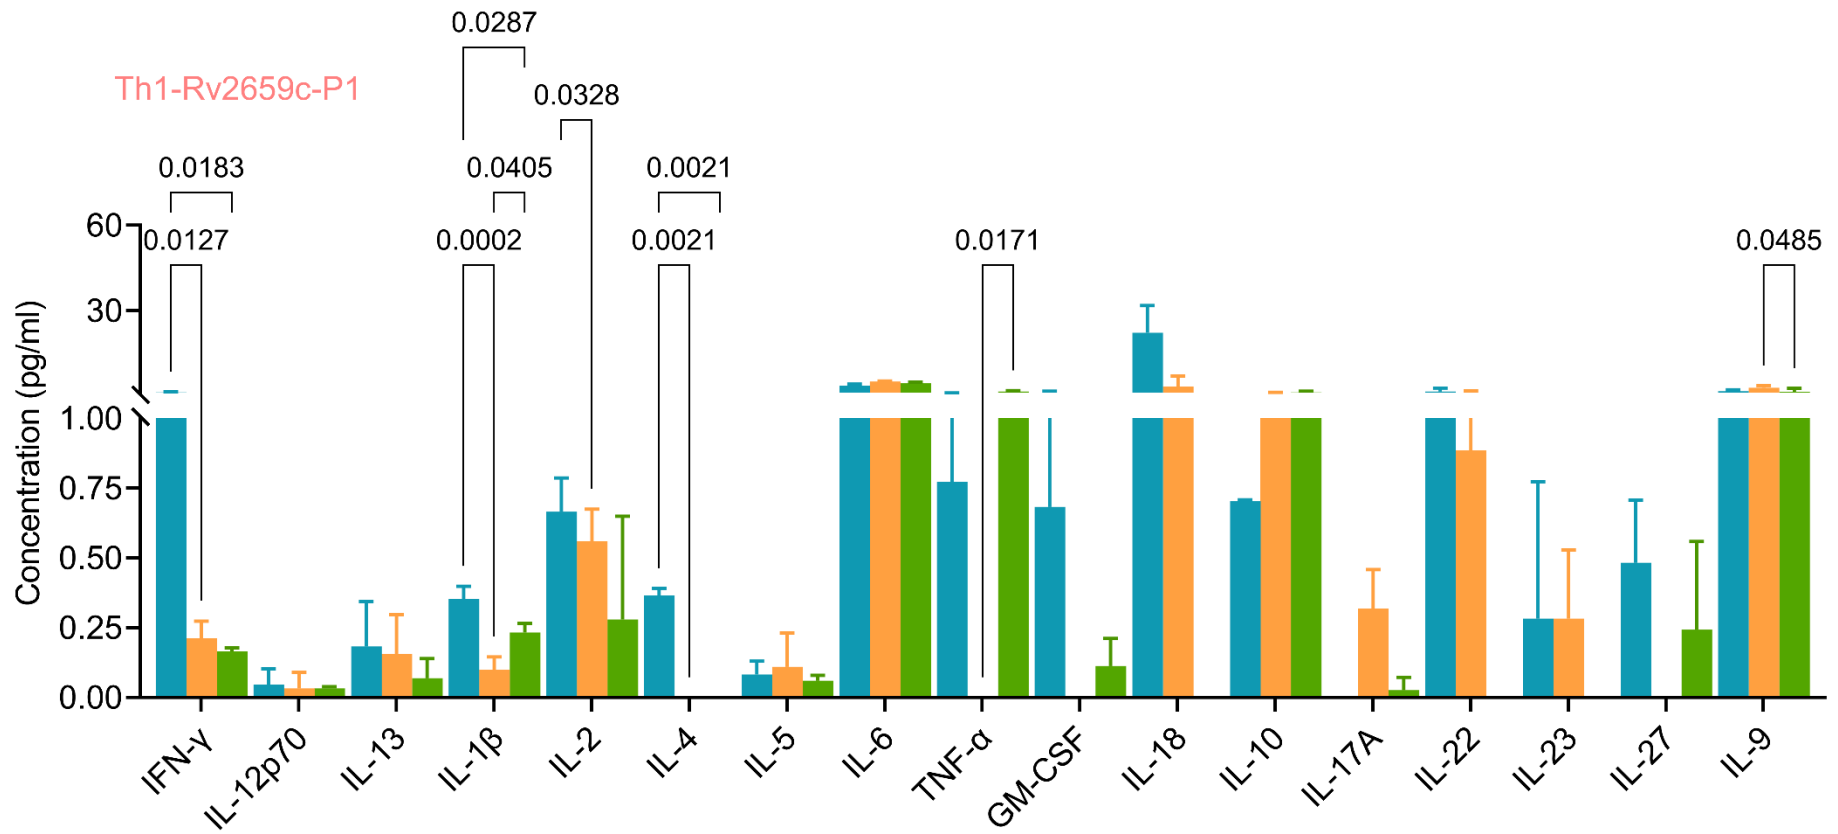

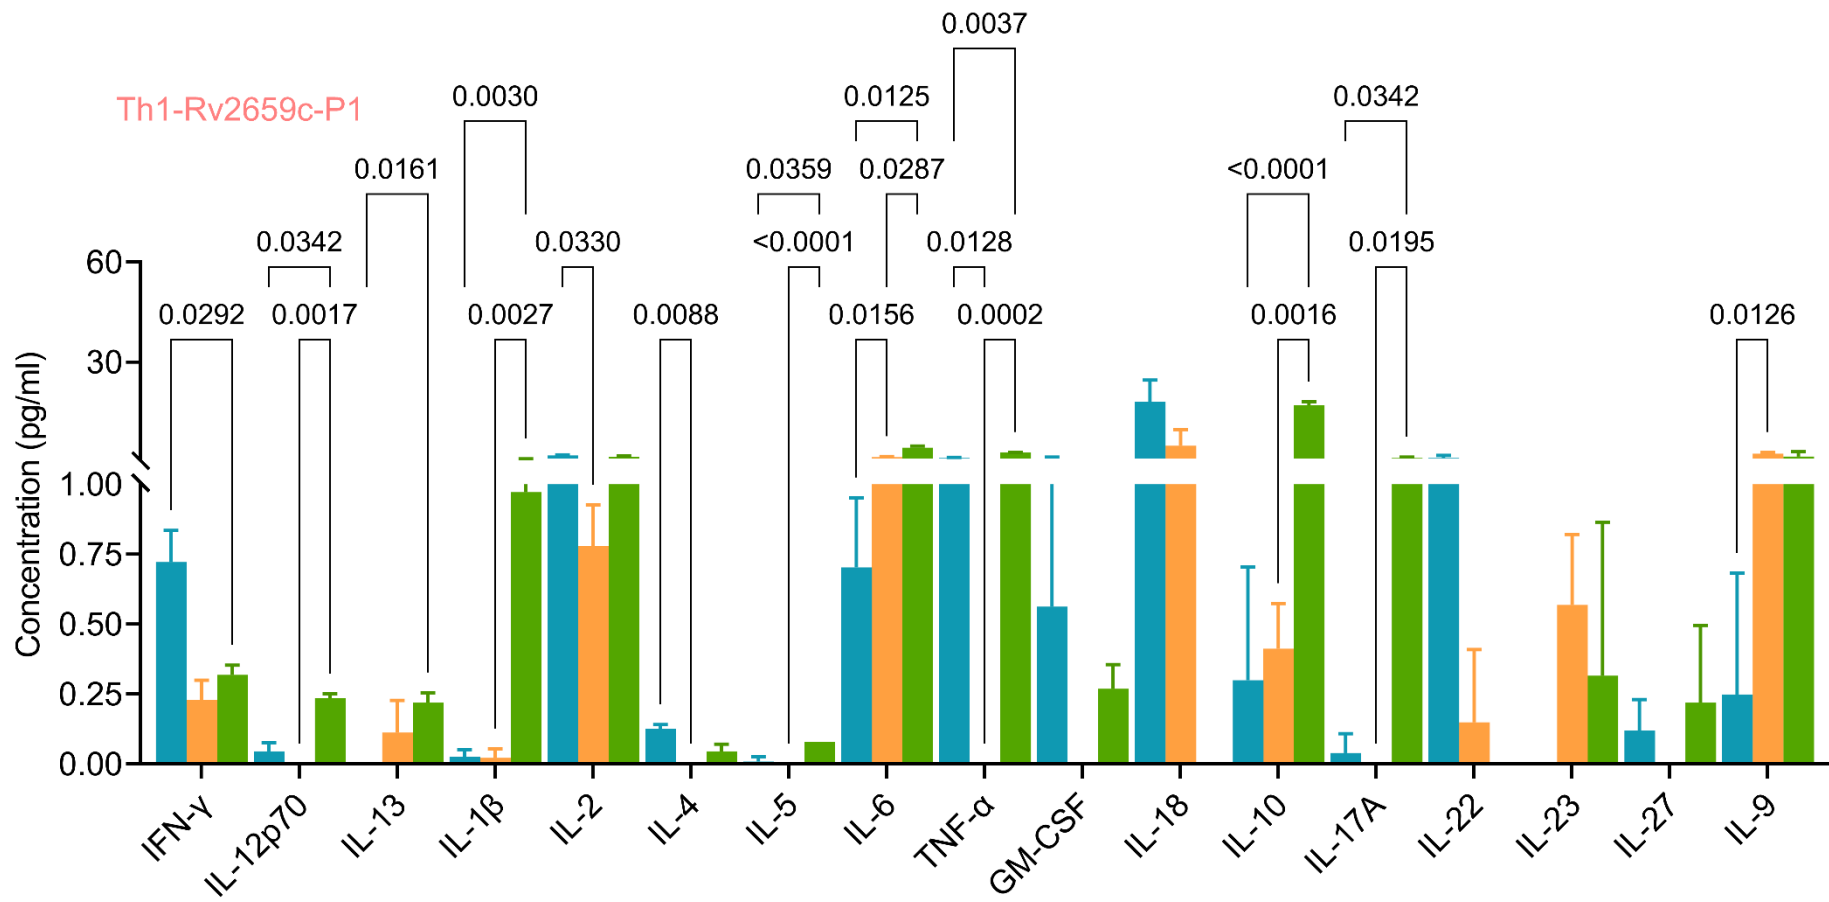

Th1-Rv2660c-P1

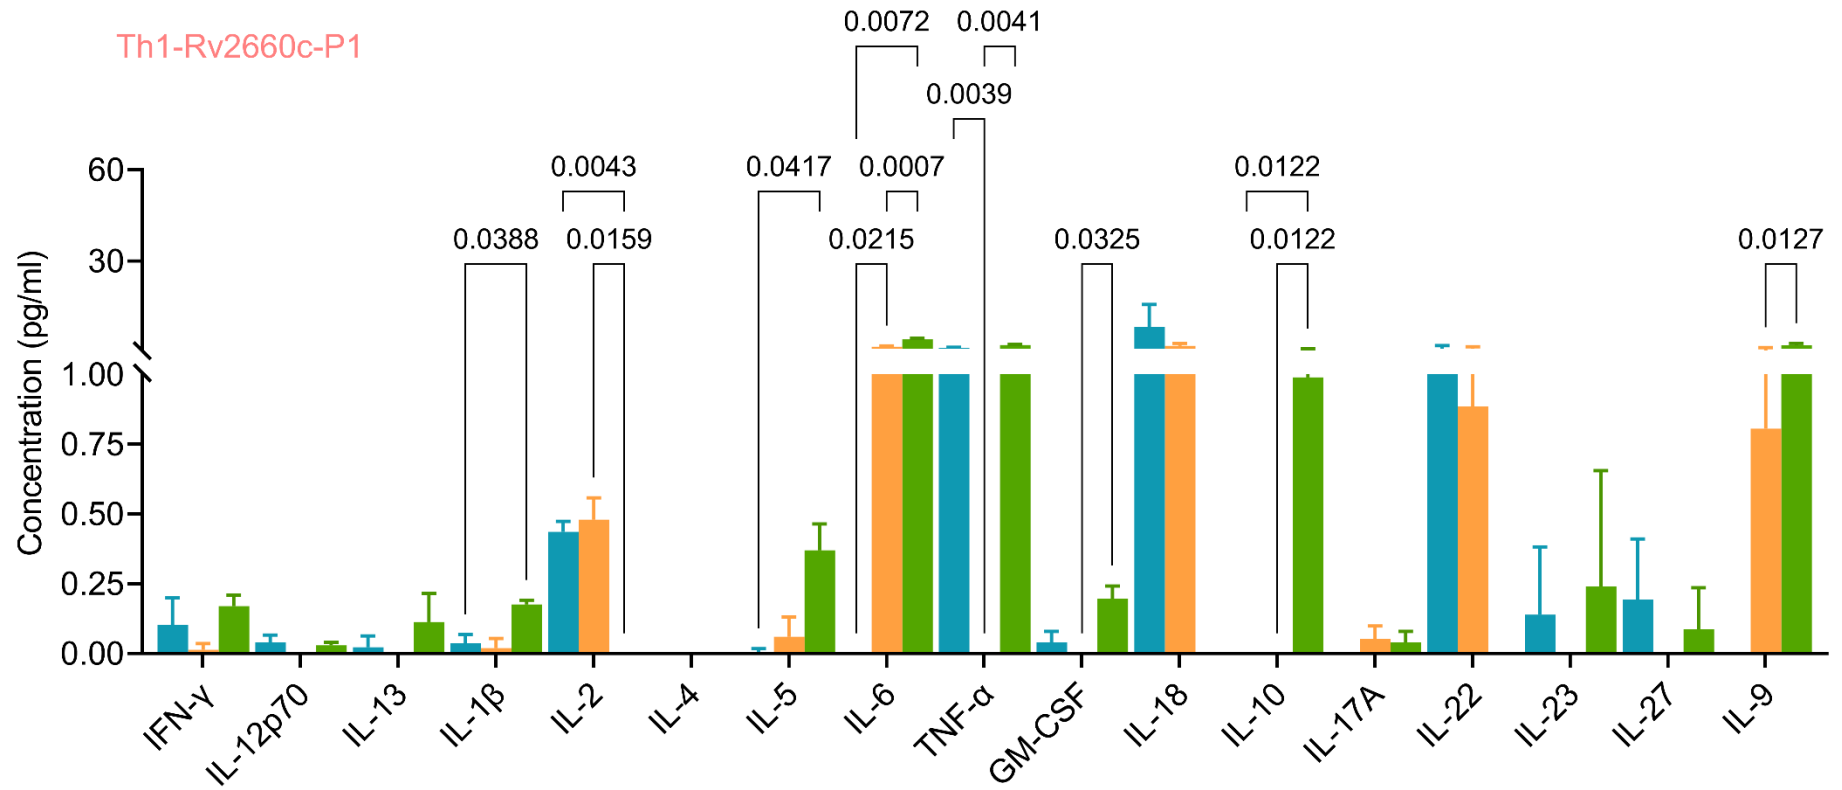

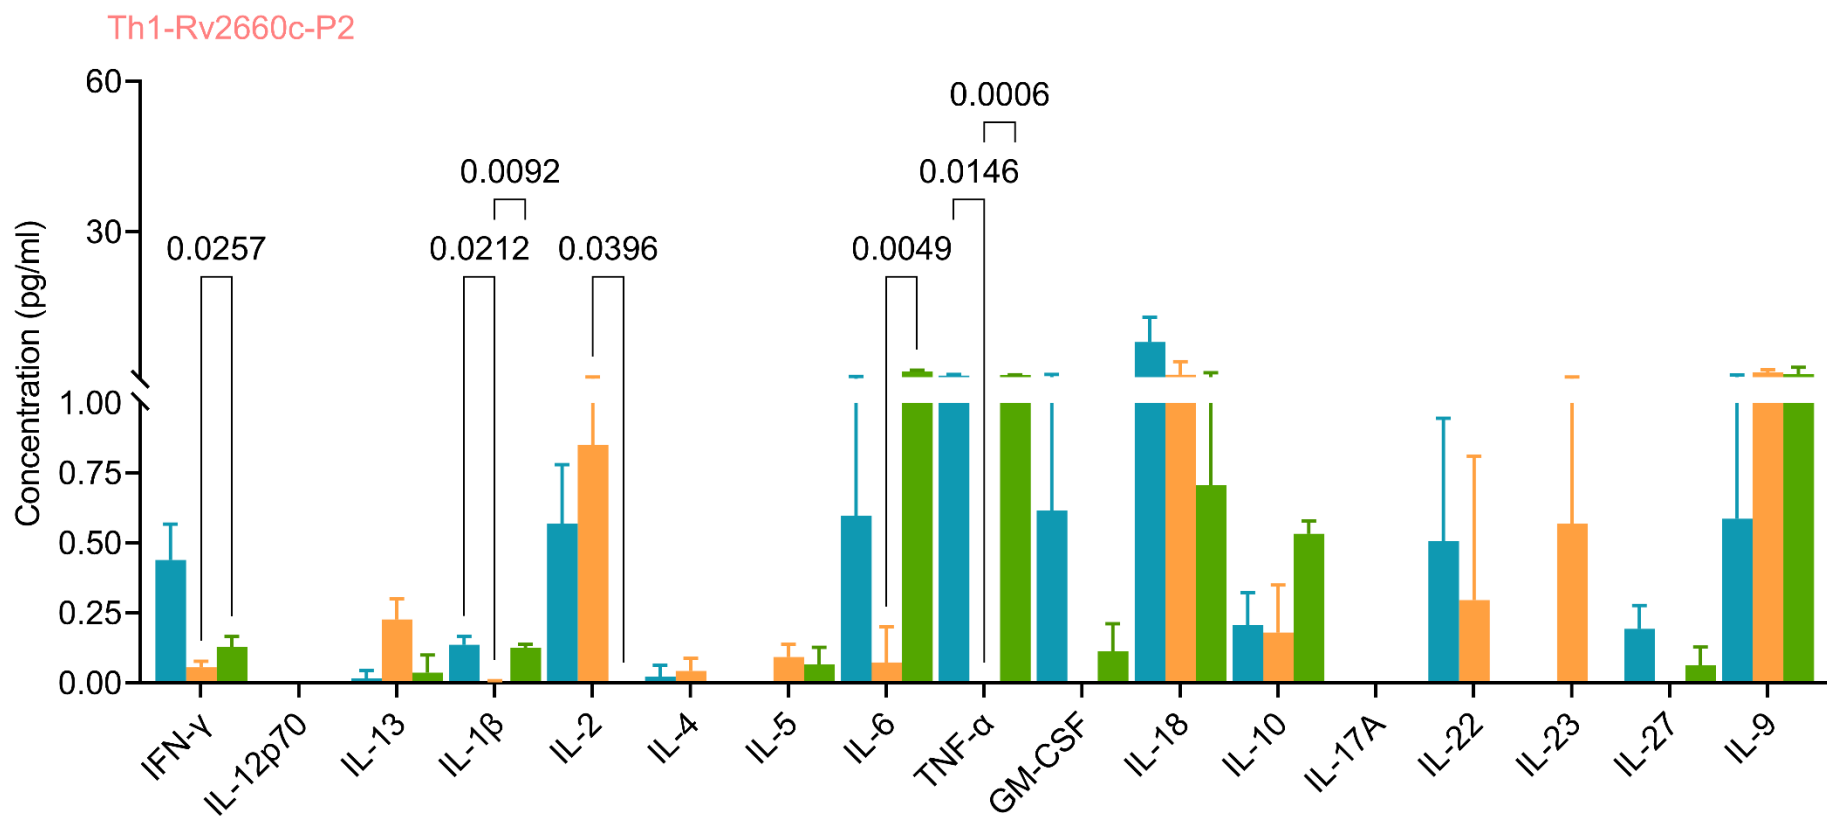

**Figure S1. Detailed information of cytokines induced by Th1 dominant peptides in mice.** The splenocytes collected from mice in ATB, LTBI, and UC groups were stimulated with the ten Th1 dominant peptides for 48 hours. The levels of IFN- $\gamma$ , IL-12p70, IL-13, IL-1 $\beta$ , IL-2, IL-4, IL-5, IL-6, TNF- $\alpha$ , GM-CSF, IL-18, IL-10, L-17A, IL-22, IL-23, IL-27, and IL-9 cytokines in the supernatant were detected with a Mouse Th1/Th2/Th9/Th17/Th22/Treg Cytokine Kit. The cytokine differences among the three

groups were compared with the two-way analysis of variance (ANOVA) corrected with the Tukey test. All data were shown as mean + SEM ( $n = 3$ ).  $P < 0.05$  was considered significantly different.

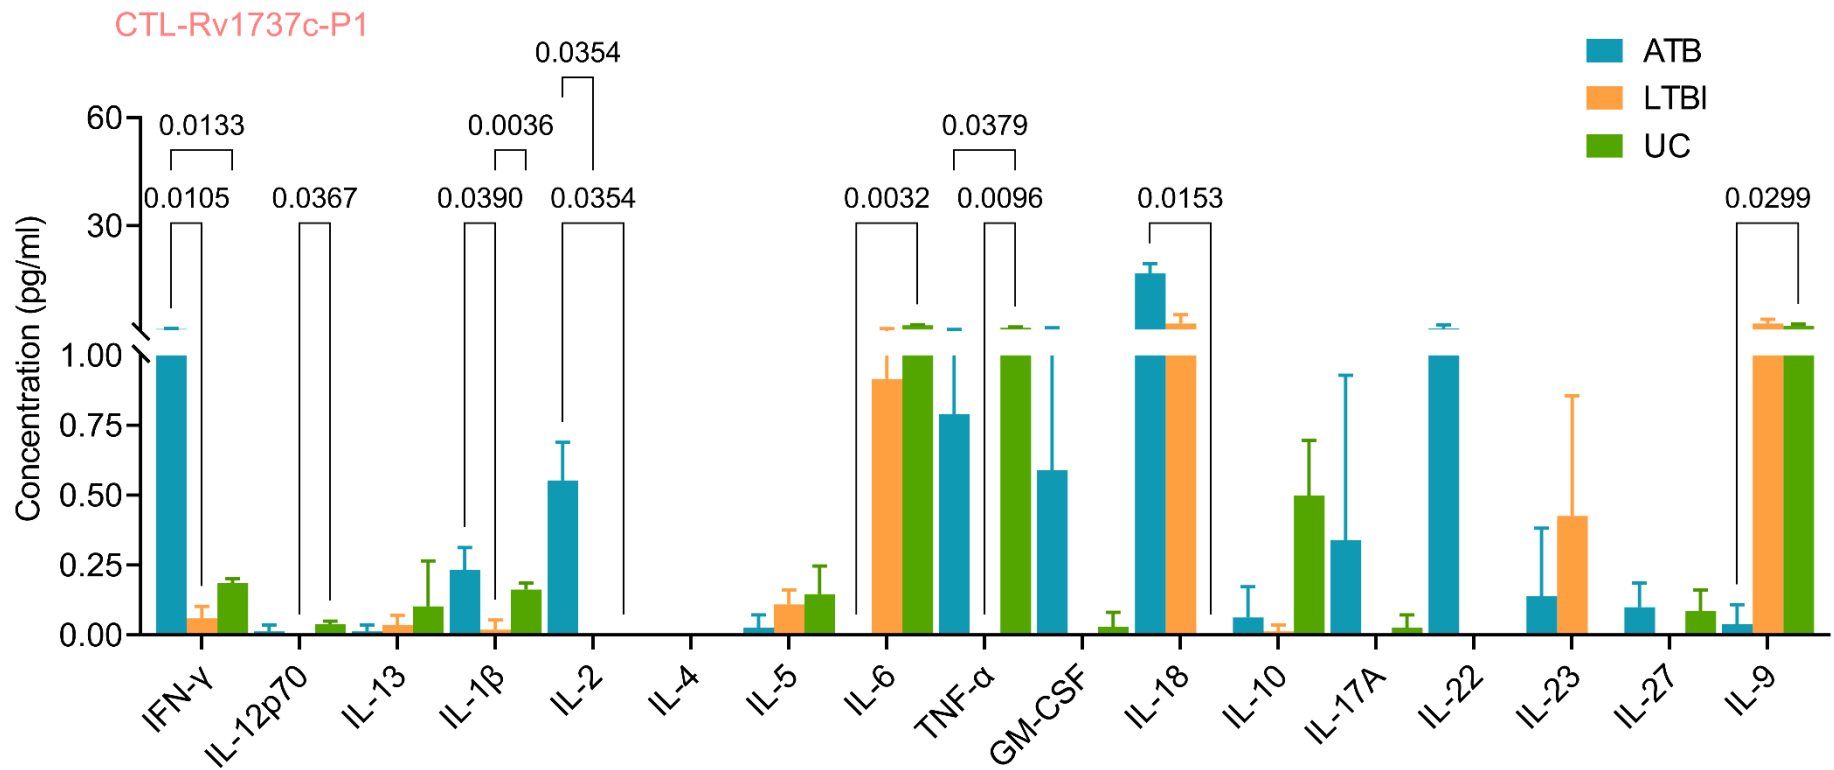

CTL-Rv1737c-P2

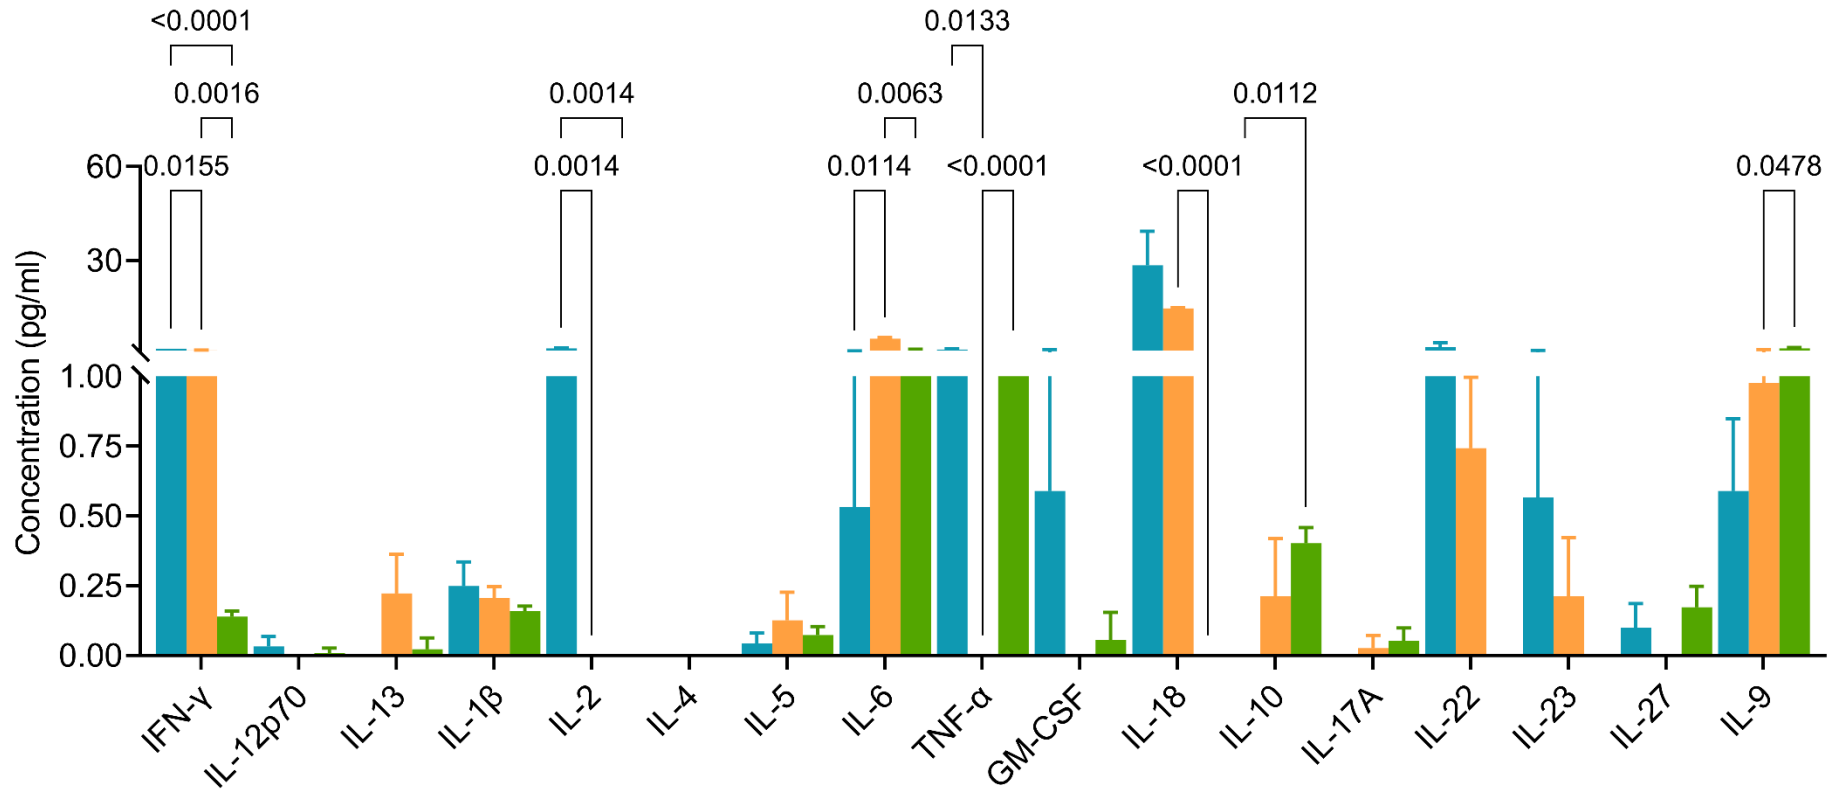

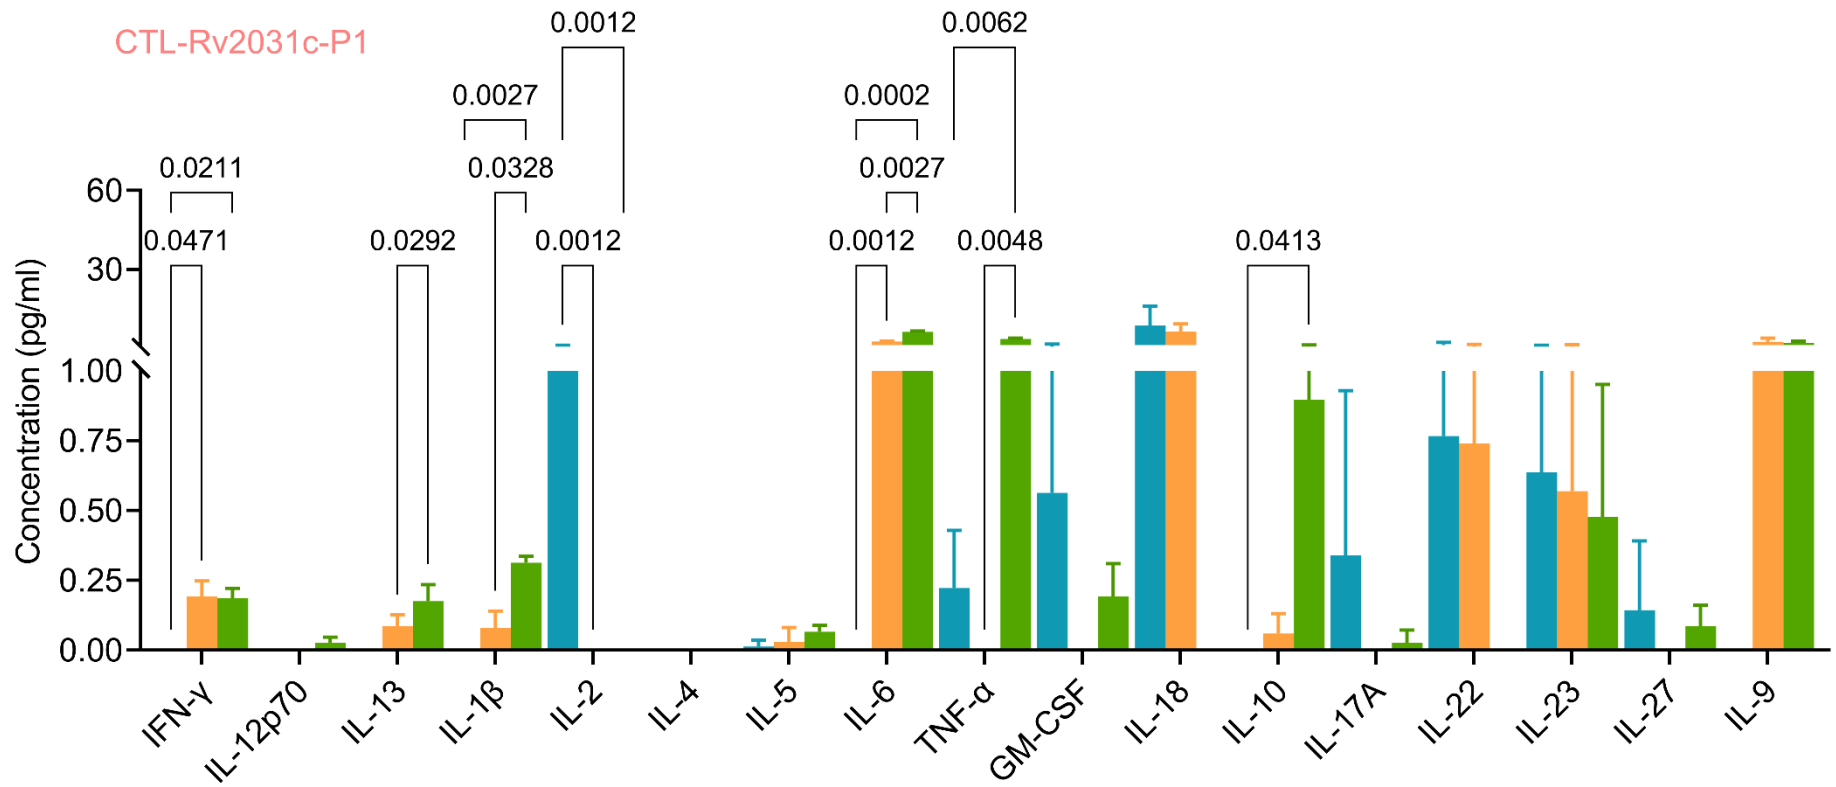



CTL-Rv2031c-P2

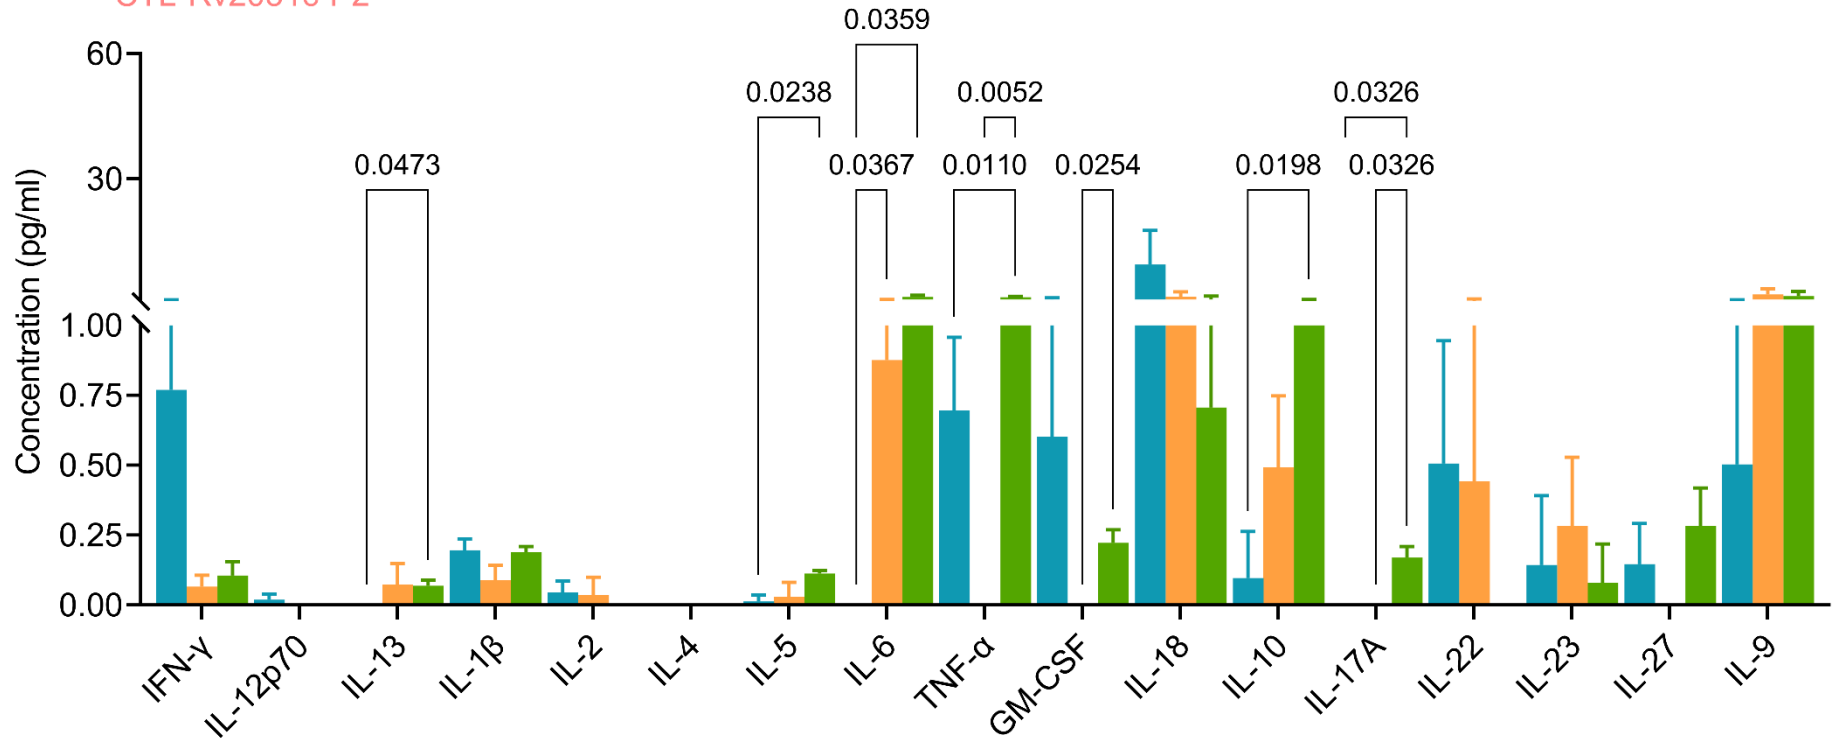

CTL-Rv2626c-P1

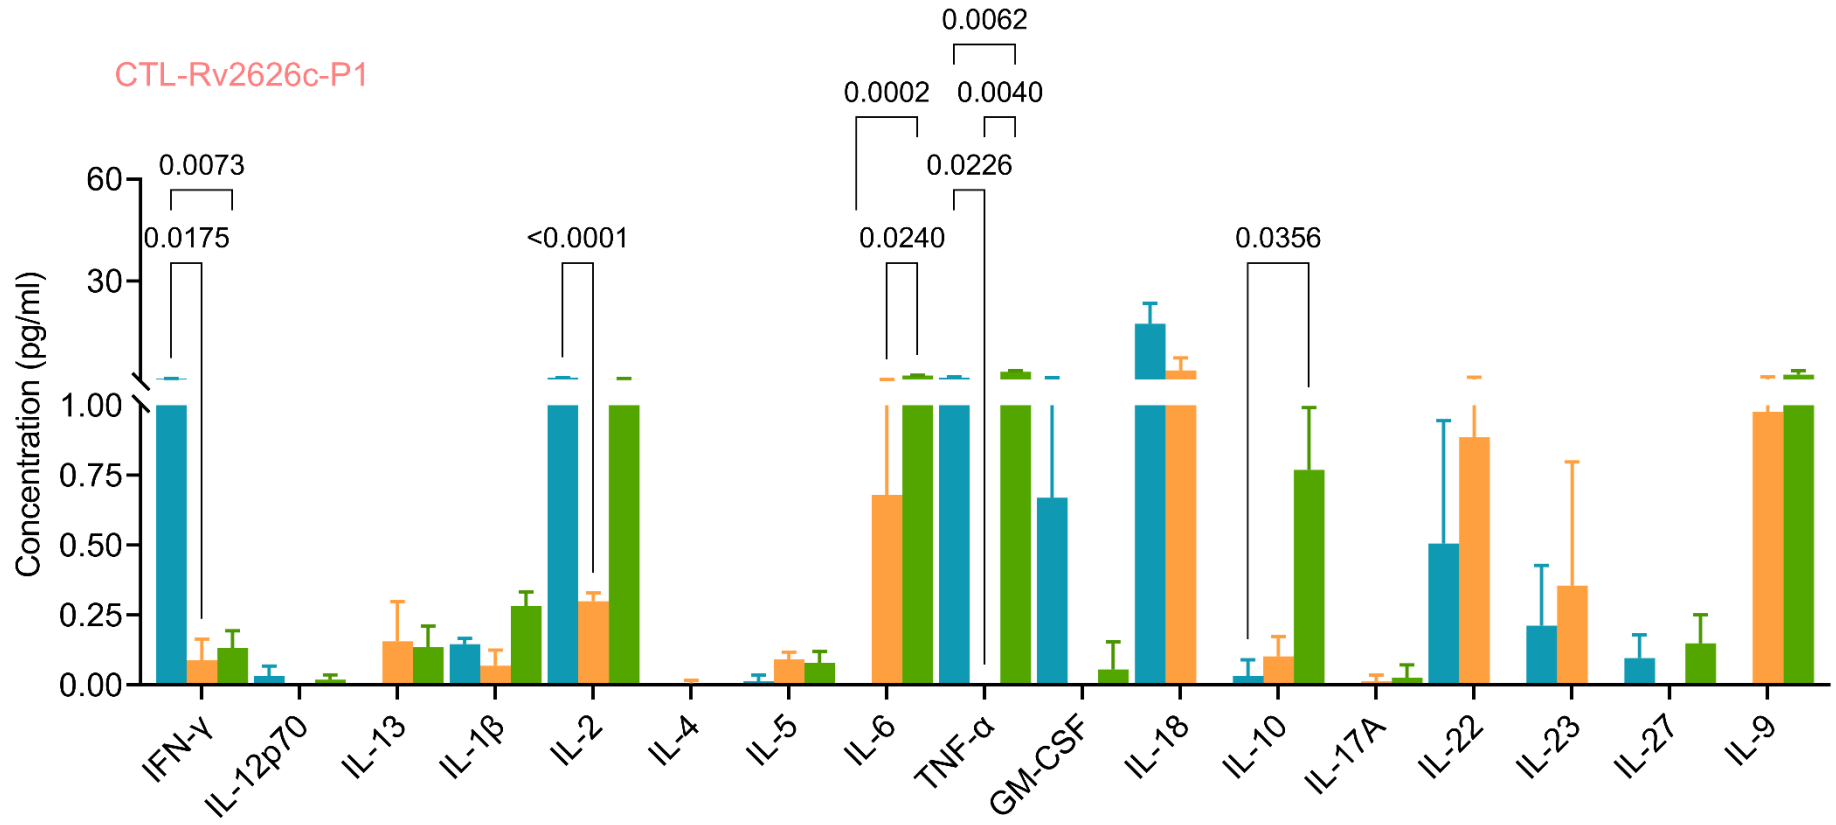

CTL-Rv2626c-P2

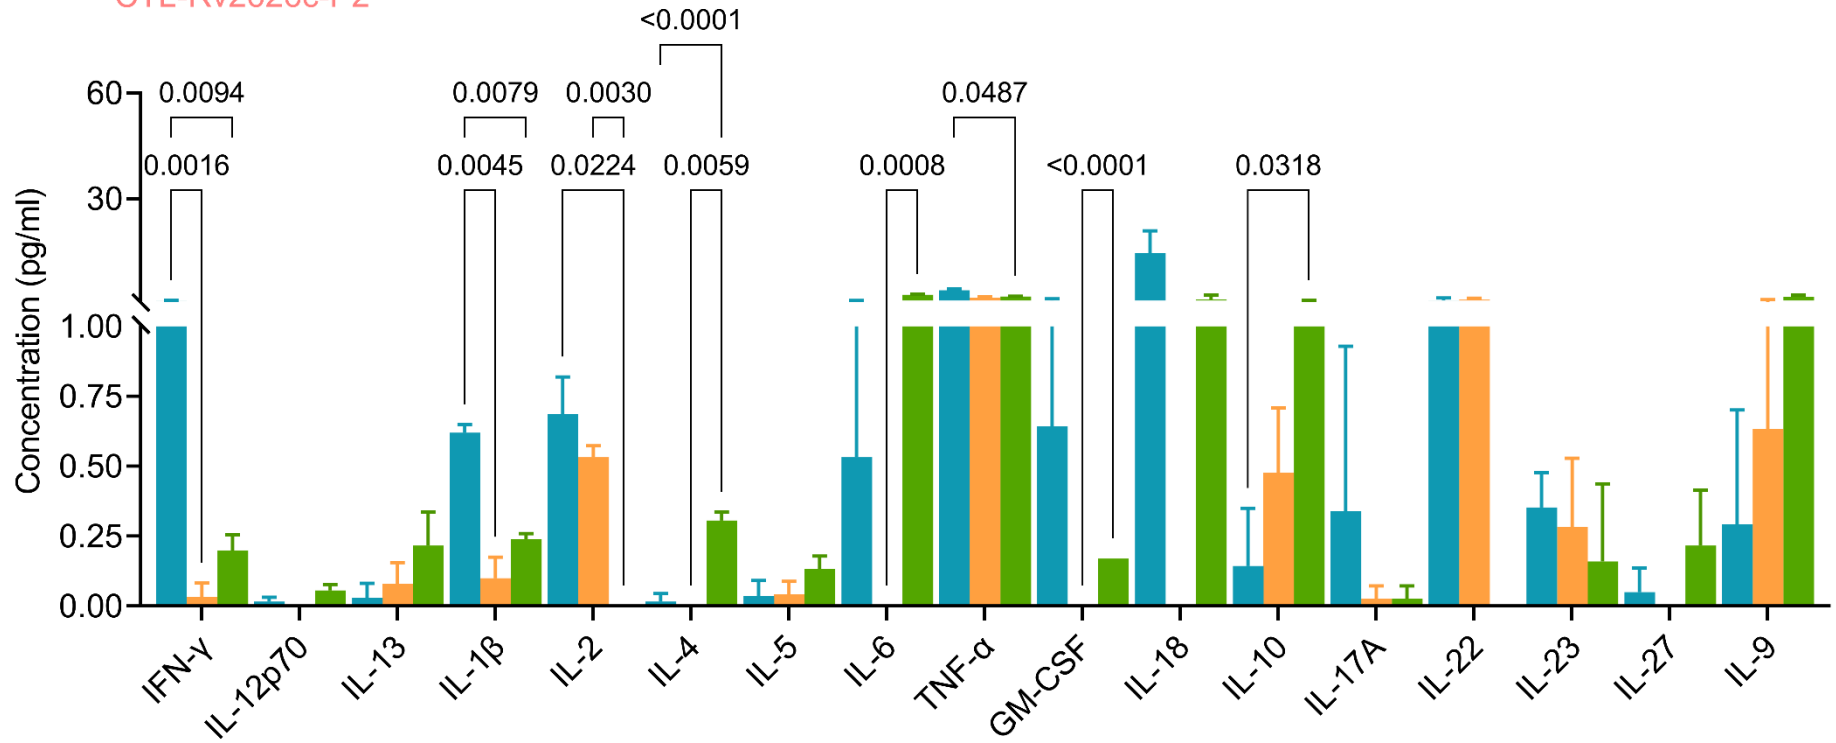

CTL-Rv2659c-P1

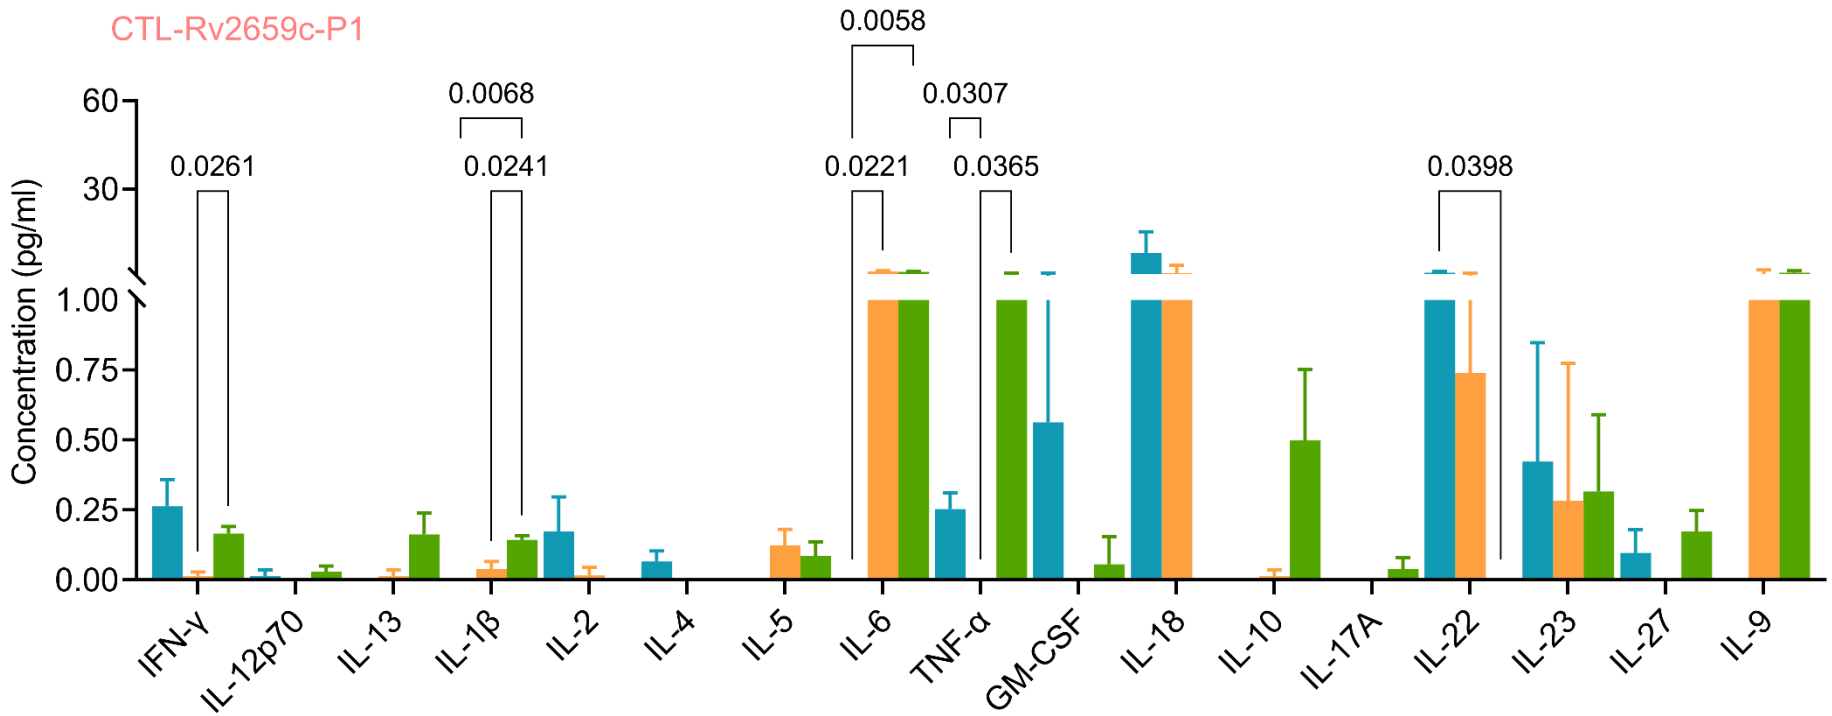

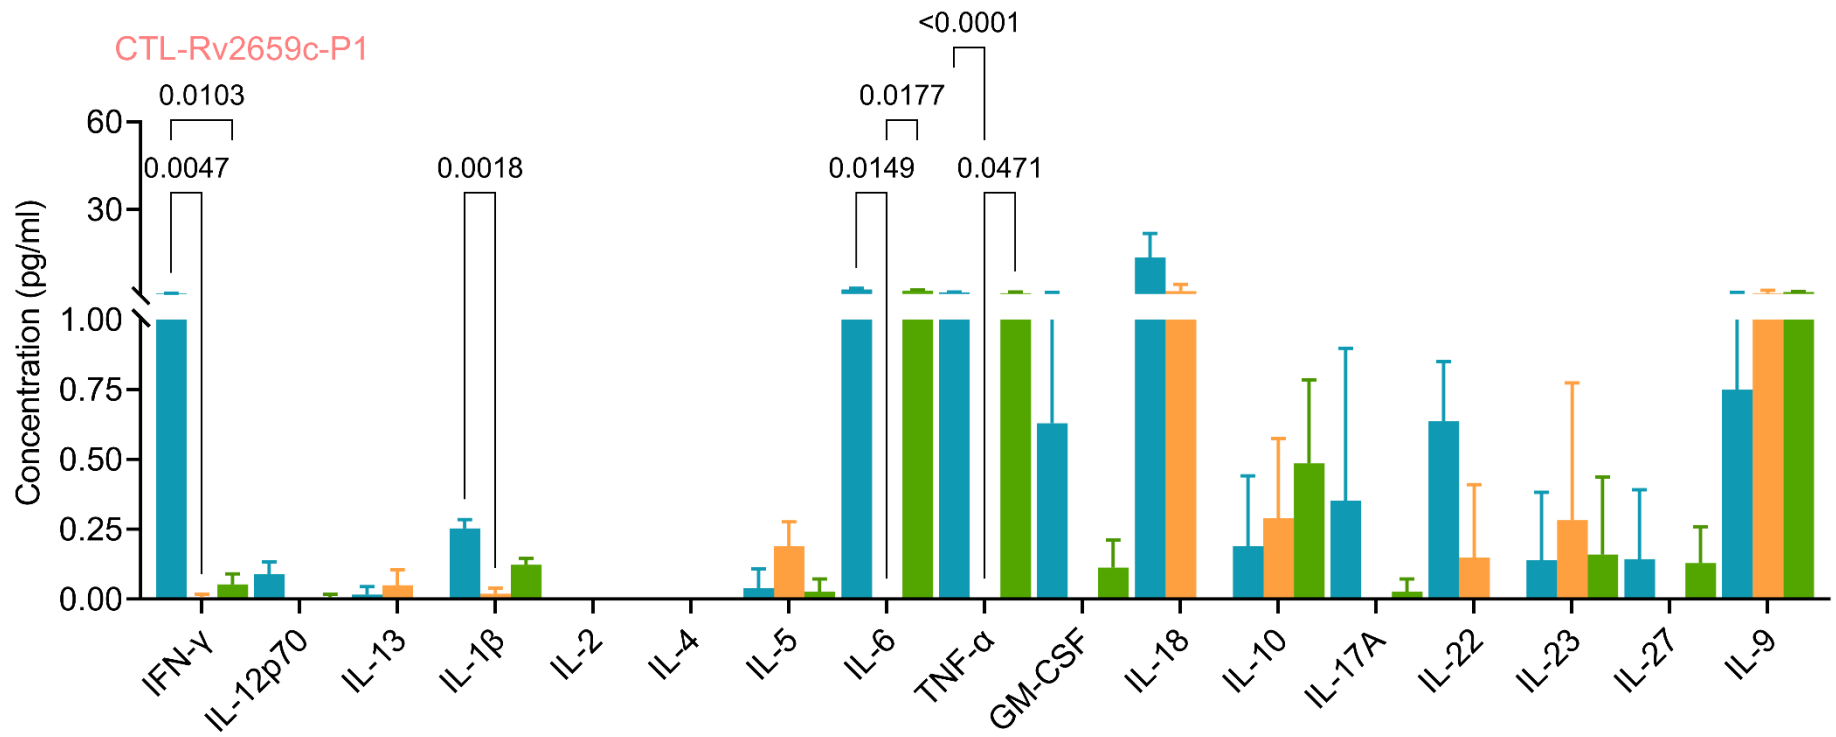

CTL-Rv2660c-P1

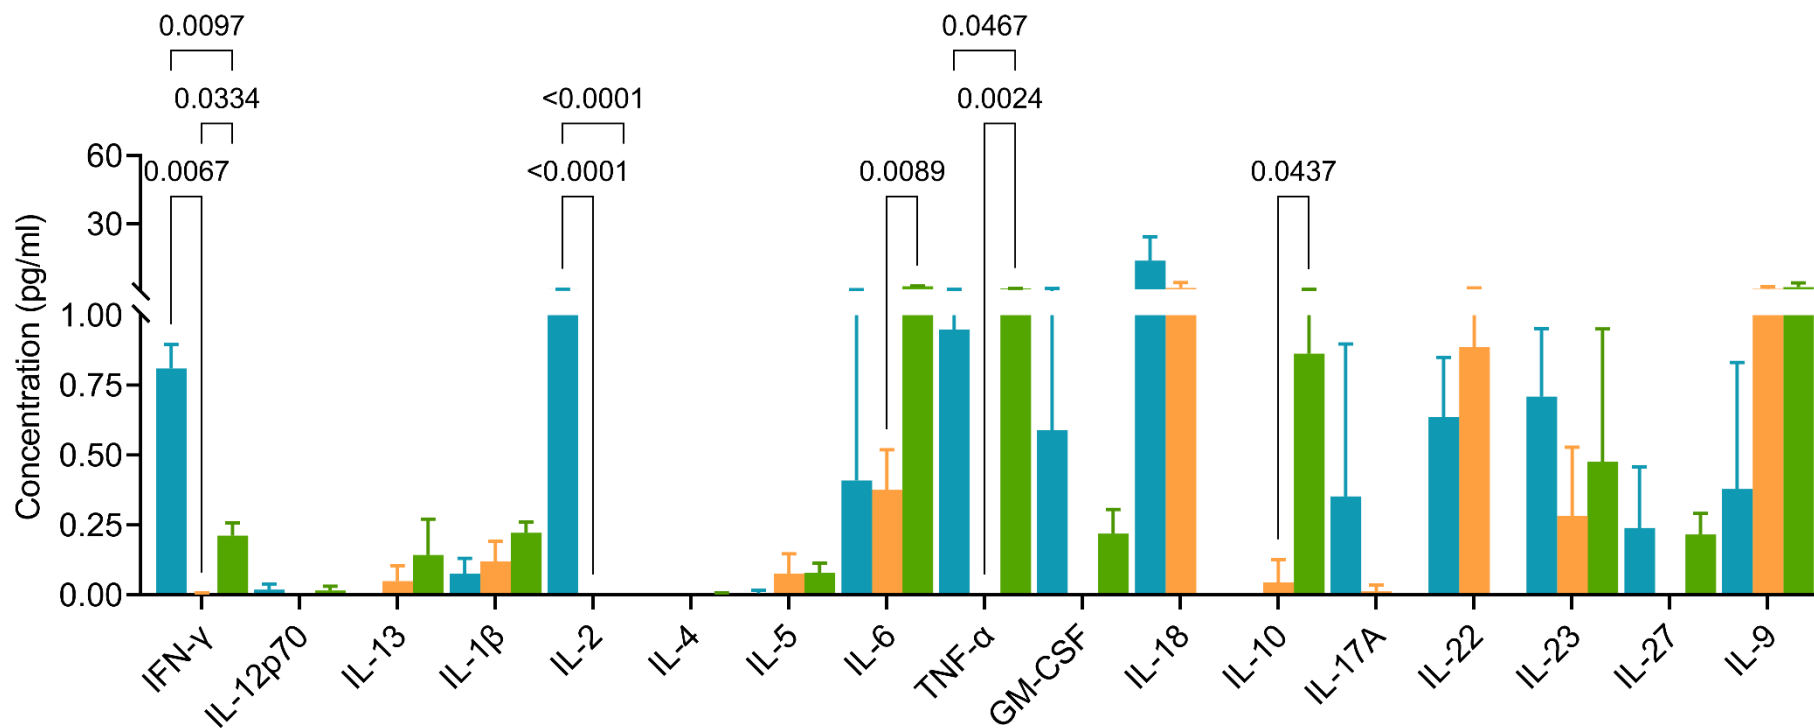

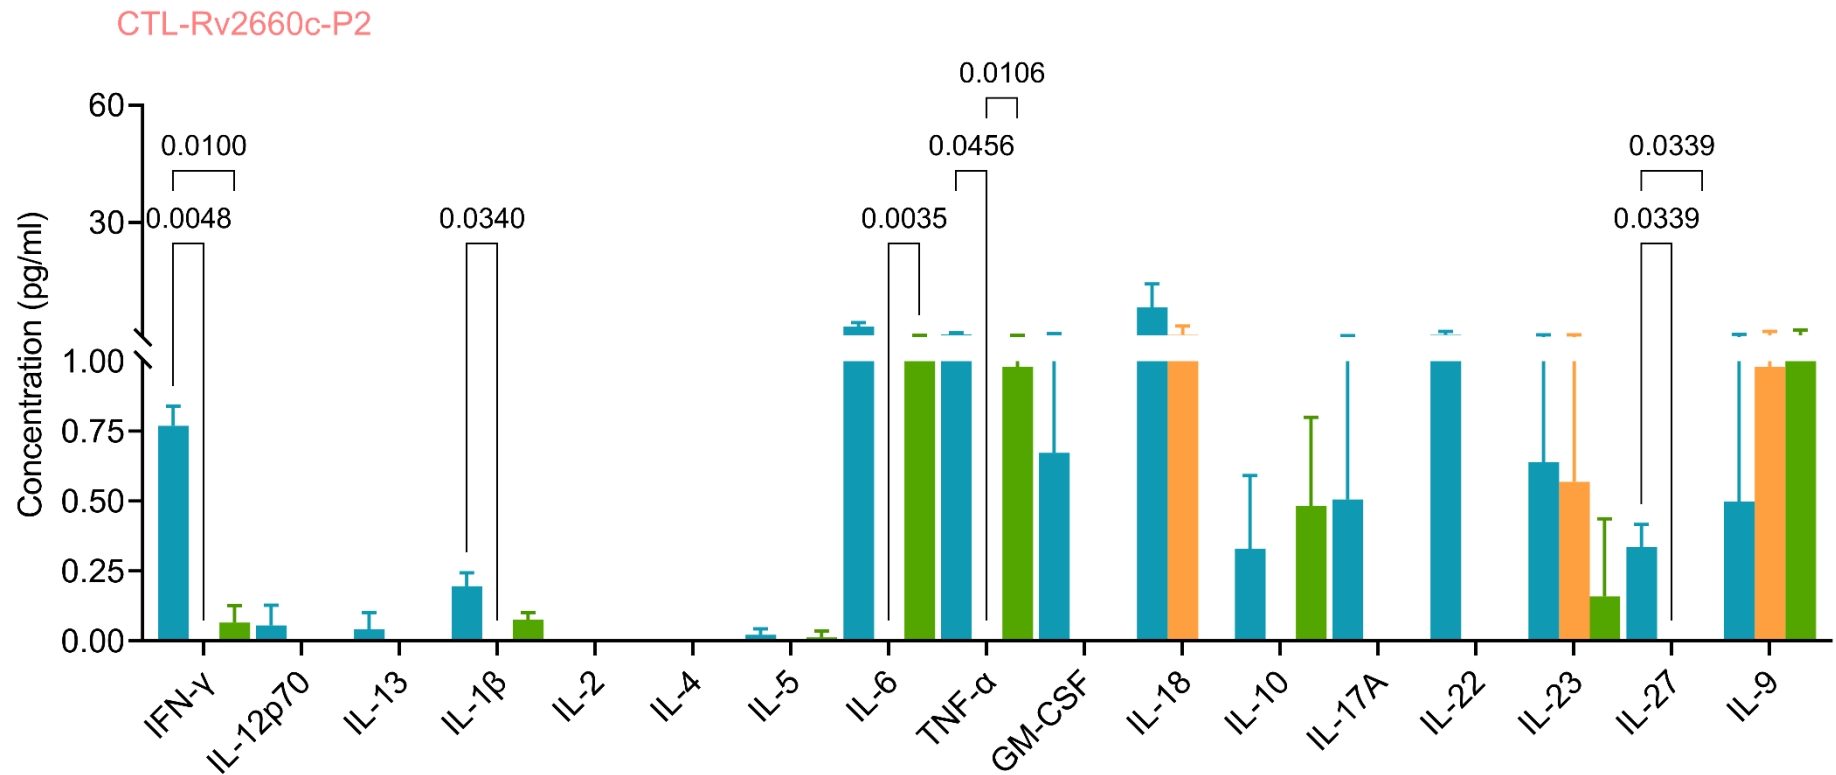

**Figure S2. Detailed information of cytokines induced by CTL dominant peptides in mice.** The splenocytes collected from mice in ATB, LTBI, and UC groups were stimulated with the ten CTL dominant peptides for 48 hours. The levels of IFN- $\gamma$ , IL-12p70, IL-13, IL-1 $\beta$ , IL-2, IL-4, IL-5, IL-6, TNF- $\alpha$ , GM-CSF, IL-18, IL-10, L-17A, IL-22, IL-23, IL-27, and IL-9 cytokines in the supernatant were detected with a Mouse Th1/Th2/Th9/Th17/Th22/Treg Cytokine Kit. The cytokine differences among the three

groups were compared with the two-way analysis of variance (ANOVA) corrected with the Tukey test. All data were shown as mean + SEM ( $n = 3$ ).  $P < 0.05$  was considered significantly different.

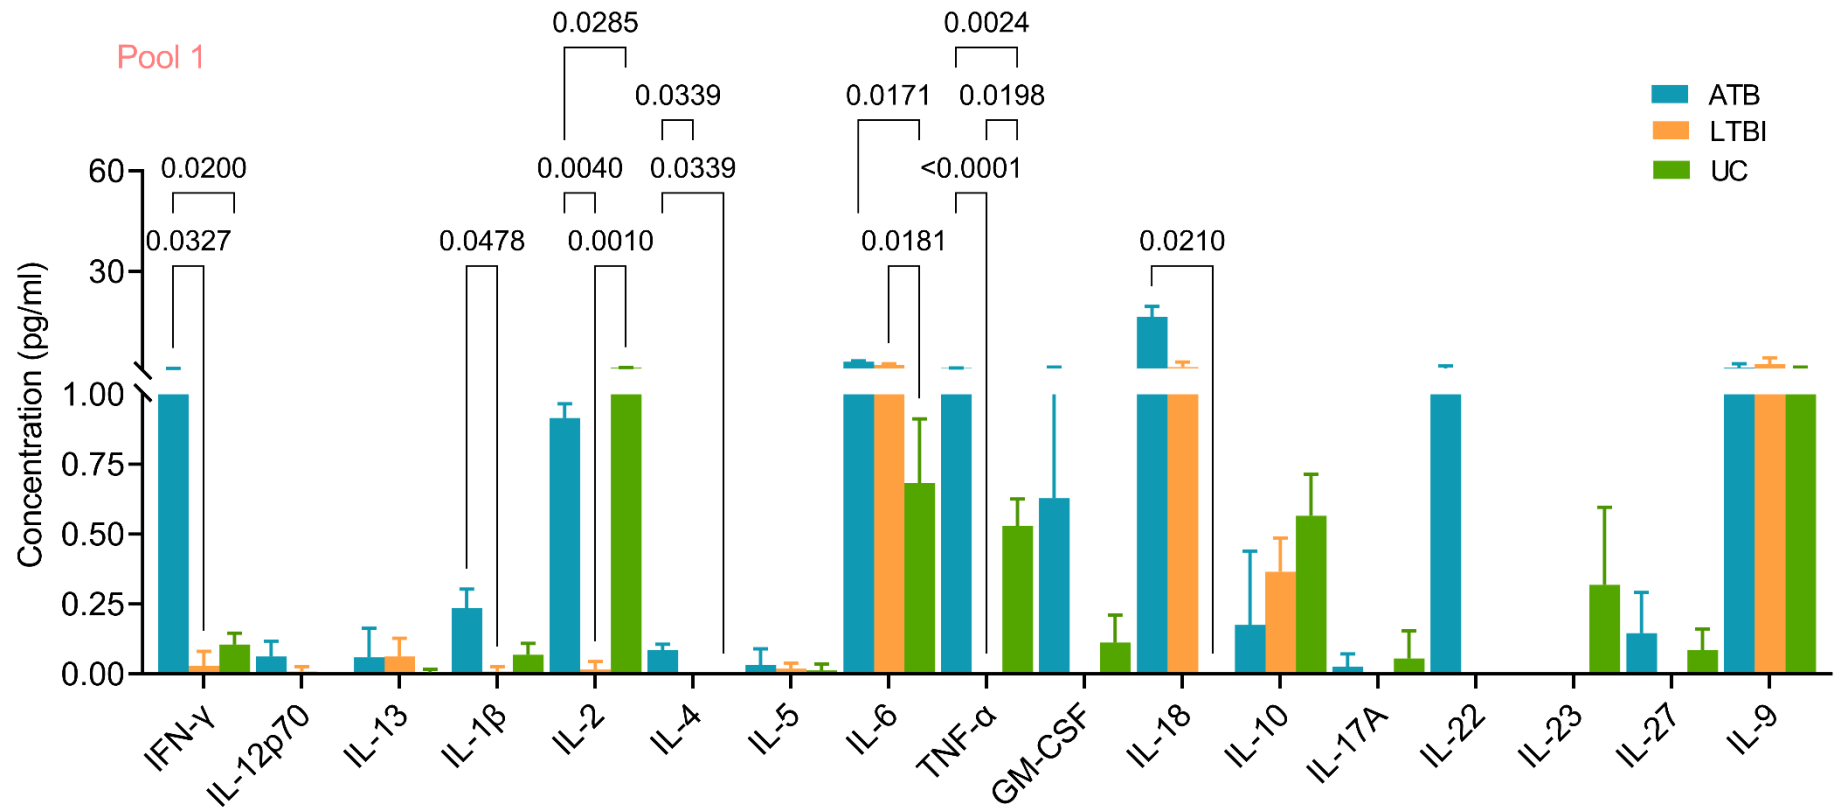



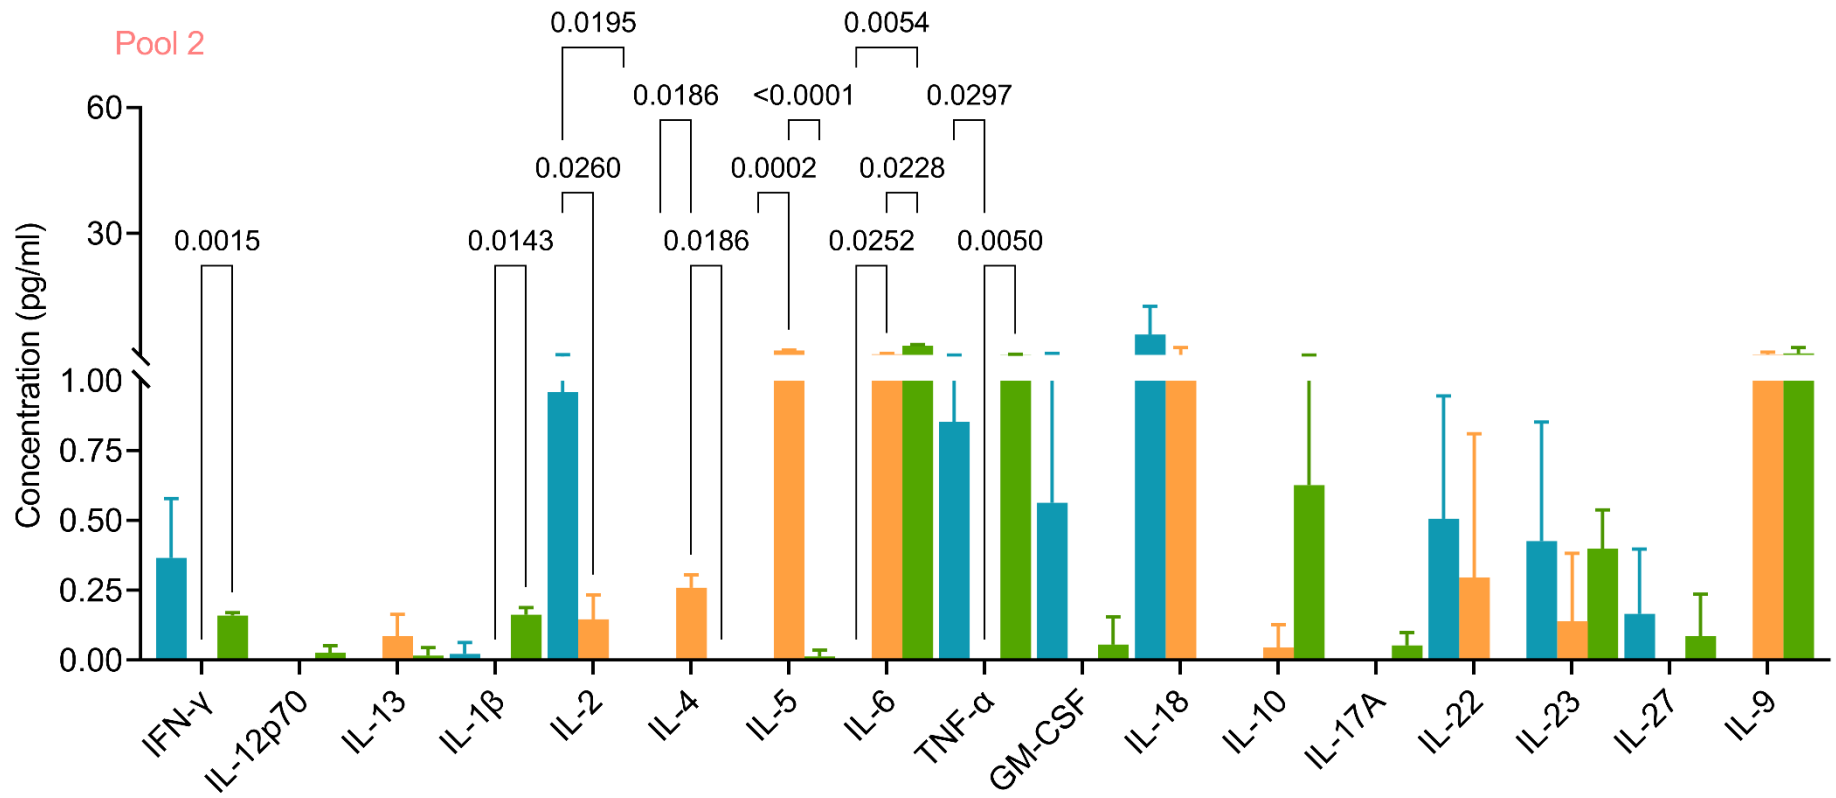

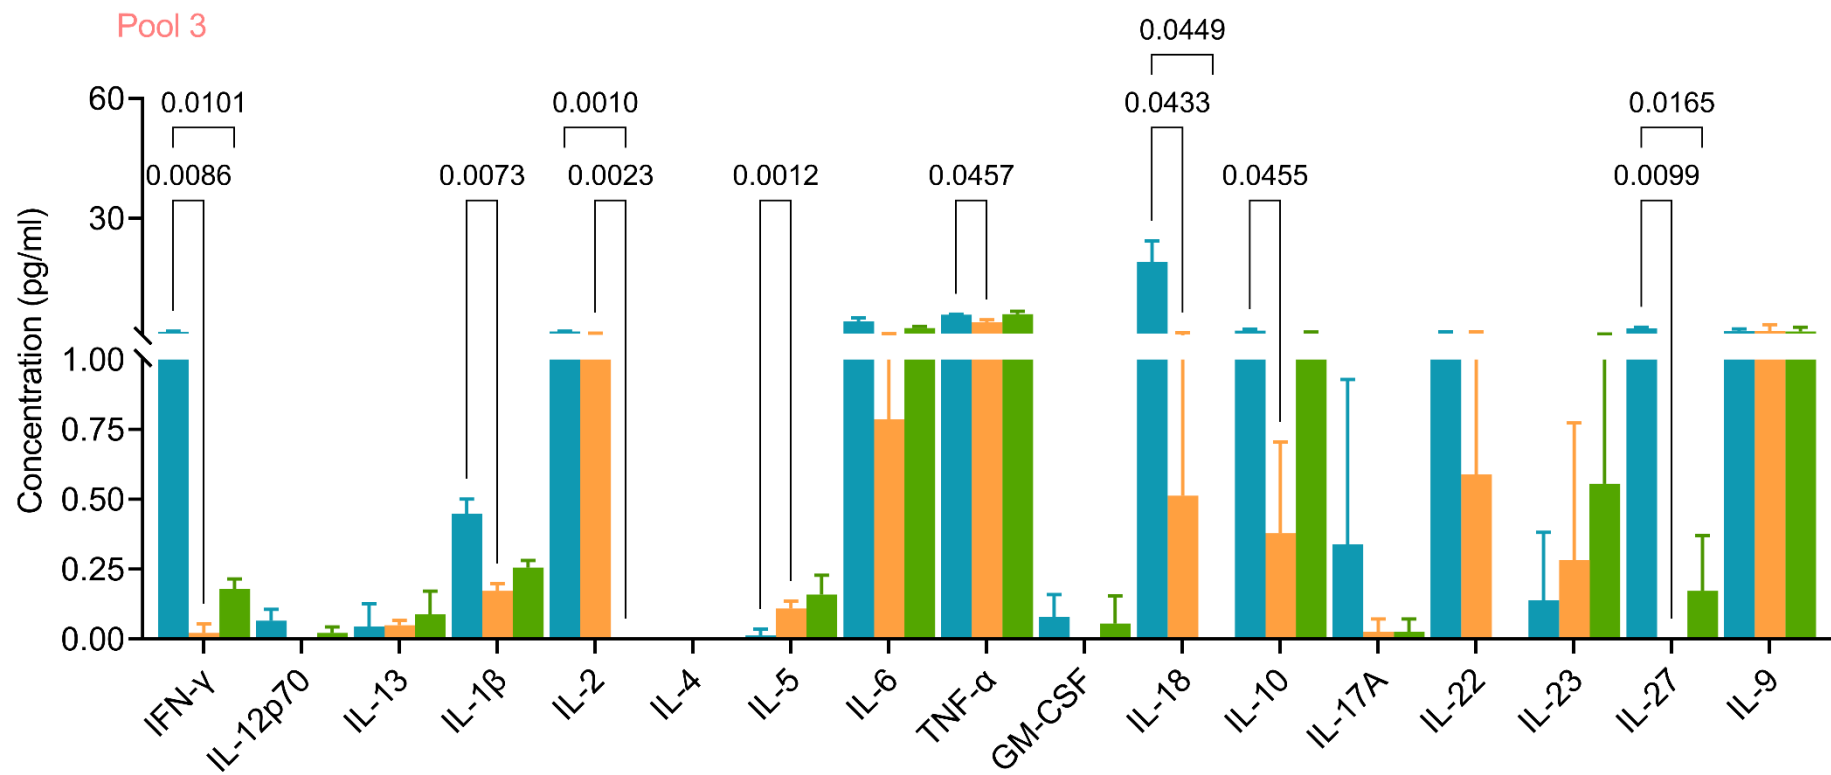

Pool 4

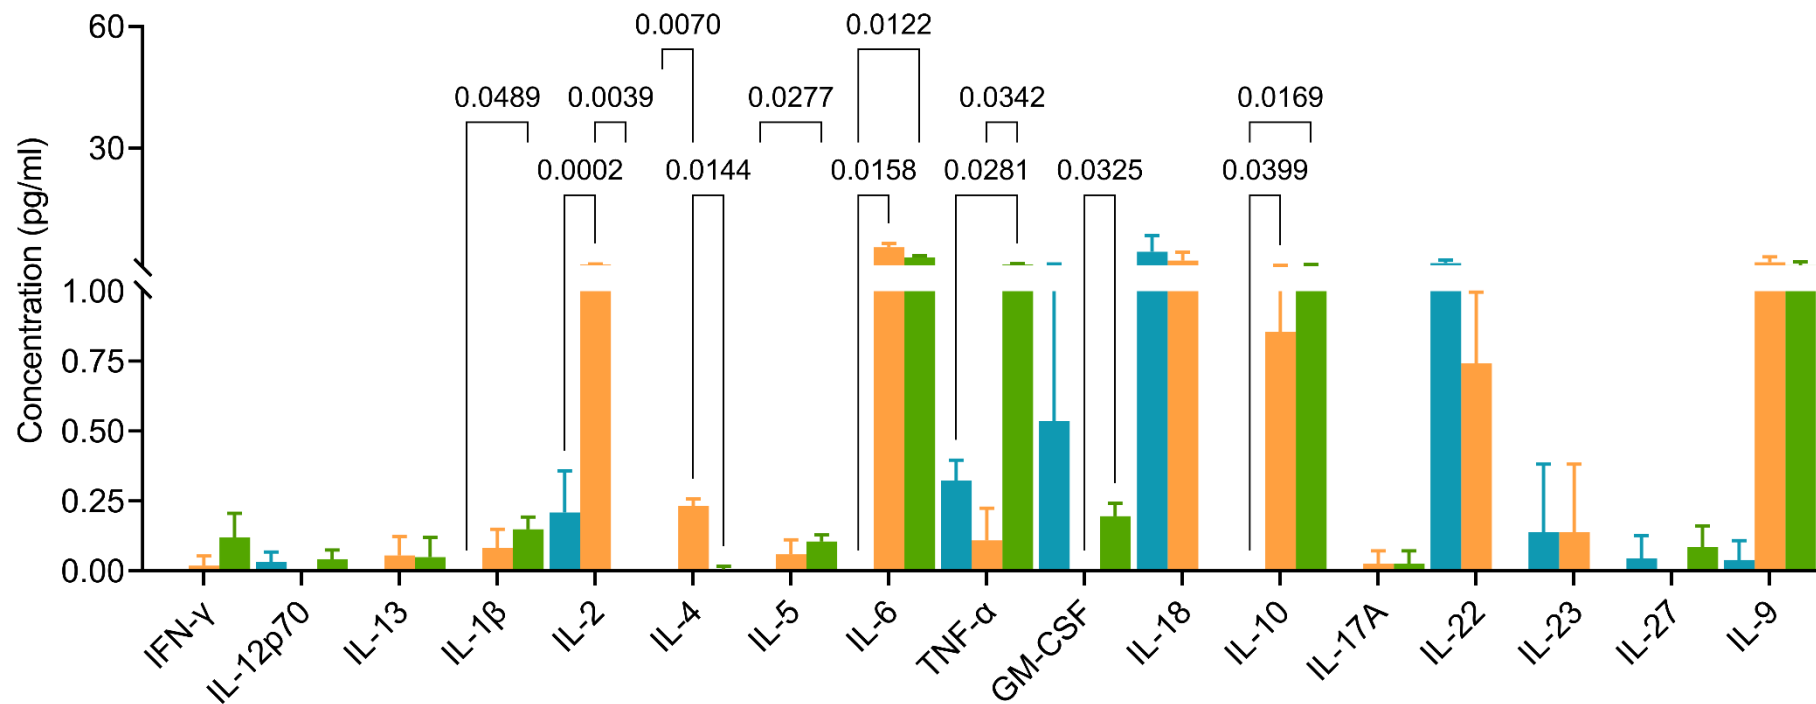

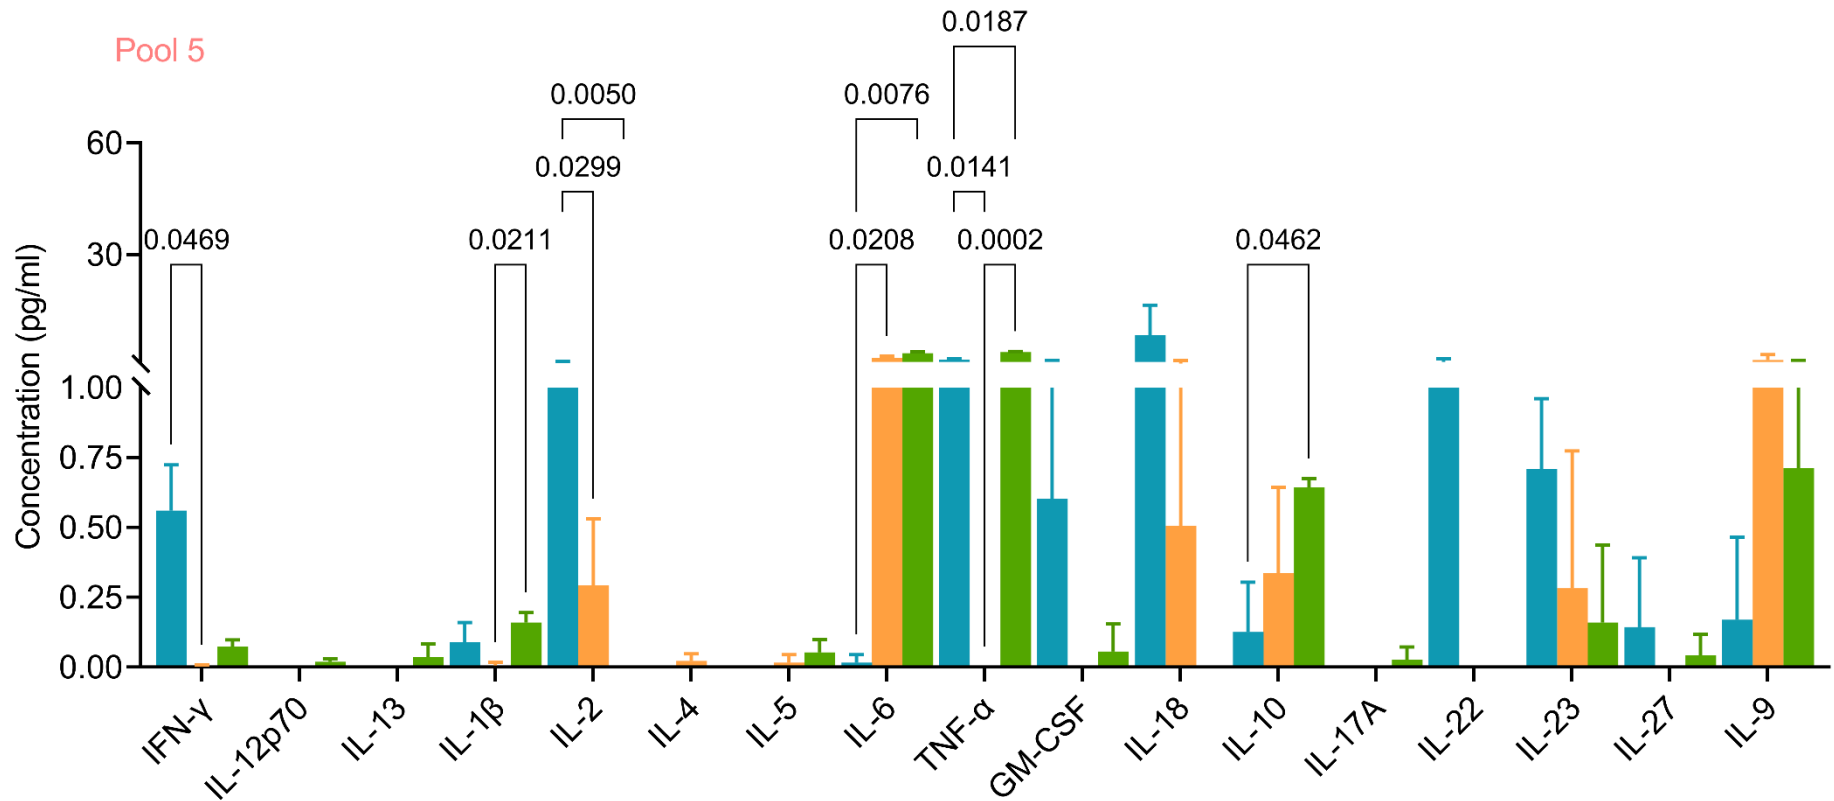

**Figure S3. Detailed information on cytokines induced by peptide pools in mice.** The splenocytes collected from mice in ATB, LTBI, and UC groups were stimulated with the five peptides pools for 48 hours. The levels of IFN- $\gamma$ , IL-12p70, IL-13, IL-1 $\beta$ , IL-2, IL-4, IL-5, IL-6, TNF- $\alpha$ , GM-CSF, IL-18, IL-10, L-17A, IL-22, IL-23, IL-27, and IL-9 cytokines in the supernatant were detected with a Mouse Th1/Th2/Th9/Th17/Th22/Treg Cytokine Kit. The cytokine differences among the three groups were compared with

the two-way analysis of variance (ANOVA) corrected with the Tukey test. All data were shown as mean + SEM ( $n = 3$ ).  $P < 0.05$  was considered significantly different.
